# Supplementary material for: Synthesis, kinetics and cellular studies of new phenothiazine analogs as potent human-TLK inhibitors
Source: Royal Society of Chemistry journal article supplement (doi:10.1039/d2ob02191a), 2023-01-01
Supplement: d2ob02191a1.pdf [file d2ob02191a1.pdf]

## Synthesis, Kinetics and Cellular studies of new phenothiazine analogs as potent human-TLK inhibitors

Delna Johnson, †<sup>a</sup> Javeena Hussain, †<sup>a</sup> Siddhant Bhoir, †<sup>b</sup> Vaishali Chandrasekaran, <sup>b</sup> Parul Sahrawat, <sup>a</sup> Tanya Hans, <sup>a</sup> Md Imtiaz Khalil, <sup>c</sup> Arrigo De Benedetti, <sup>c</sup> Vijay Thiruvengatam <sup>\*b</sup> and Sivapriya Kirubakaran <sup>\*a</sup>

<sup>a</sup>Discipline of Chemistry, Indian Institute of Technology, Gandhinagar, Simkheda, Palaj, Gandhinagar, Gujarat, India -382355

<sup>b</sup>Discipline of Biological Engineering, Indian Institute of Technology, Gandhinagar, Simkheda, Palaj, Gandhinagar, Gujarat, India -382355

<sup>c</sup>Department of Biochemistry and Molecular Biology, LSU Health Shreveport, 1501 Kings Highway, Shreveport, LA 71103, USA

\*Correspondence Authors:

Dr. Sivapriya Kirubakaran, Discipline of Chemistry, Indian Institute of Technology Gandhinagar, Simkheda, Palaj, Gandhinagar-382355, Gujarat, India. E-mail: ([priyak@iitgn.ac.in](mailto:priyak@iitgn.ac.in))

Dr. Vijay Thiruvengatam, Discipline of Biological Engineering, Indian Institute of Technology Gandhinagar, Simkheda, Palaj, Gandhinagar-382355, Gujarat, India

E-mail: ([vijay@iitgn.ac.in](mailto:vijay@iitgn.ac.in))

## Table of Contents

|                                                                                                 |    |
|-------------------------------------------------------------------------------------------------|----|
| Figure S1: PCR amplification and ligation of TLK-kinase domain.....                             | 4  |
| Figure S2: Restriction digestion of positive ligated colonies .....                             | 5  |
| Figure S3: Bacterial transformation of constructed plasmid .....                                | 5  |
| Figure S4: Optimisation of hTLK1B-KD expression .....                                           | 6  |
| Figure S5: Size exclusion chromatography using FPLC of hTLK1B_KD .....                          | 6  |
| Figure S6: Mass spectrometry analysis of recombinant fusion protein.....                        | 7  |
| Figure S7: PSIPRED analysis of hTLK-KD .....                                                    | 8  |
| Figure S8: The titration curves with Histone and Nek1 as a substrate.....                       | 9  |
| Figure S9: Docking studies of ligands with TLK-kinase domain .....                              | 9  |
| Table S1: ADME and drug-likeness of synthesized compounds .....                                 | 10 |
| Analytical Data: <sup>1</sup> HNMR, <sup>13</sup> CNMR, and mass spectrum of the compounds..... | 11 |
| Figure S10. <sup>1</sup> HNMR of compound 1.....                                                | 11 |
| Figure S11. <sup>13</sup> C NMR of compound 1.....                                              | 12 |
| Figure S12. Mass spectrum of compound 1.....                                                    | 13 |
| Figure S13. <sup>1</sup> HNMR of compound 2.....                                                | 14 |
| Figure S14. <sup>13</sup> CNMR of compound 2.....                                               | 15 |
| Figure S15. Mass spectrum of compound 2.....                                                    | 16 |
| Figure S16. <sup>1</sup> HNMR of compound 3.....                                                | 17 |
| Figure S17. <sup>13</sup> CNMR of compound 3.....                                               | 18 |
| Figure S18. Mass spectrum of compound 3.....                                                    | 19 |
| Figure S19. <sup>1</sup> HNMR of compound 4.....                                                | 20 |
| Figure S20. <sup>13</sup> CNMR of compound 4.....                                               | 21 |
| Figure S21. Mass spectrum of compound 4.....                                                    | 22 |
| Figure S22. <sup>1</sup> HNMR of compound 7.....                                                | 23 |
| Figure S23. <sup>13</sup> CNMR of compound 7.....                                               | 24 |
| Figure S24. Mass spectrum of compound 7.....                                                    | 25 |
| Figure S25. <sup>1</sup> HNMR of compound 8.....                                                | 26 |

|                                                                      |           |
|----------------------------------------------------------------------|-----------|
| <b>Figure S26. <math>^{13}\text{C}</math>NMR of compound 8.....</b>  | <b>27</b> |
| <b>Figure S27. Mass spectrum of compound 8.....</b>                  | <b>28</b> |
| <b>Figure S28. <math>^1\text{H}</math>NMR of compound 9.....</b>     | <b>29</b> |
| <b>Figure S29. <math>^{13}\text{C}</math>NMR of compound 9.....</b>  | <b>30</b> |
| <b>Figure S30. Mass spectrum of compound 9.....</b>                  | <b>31</b> |
| <b>Figure S31. <math>^1\text{H}</math>NMR of compound 10.....</b>    | <b>32</b> |
| <b>Figure S32. <math>^{13}\text{C}</math>NMR of compound 10.....</b> | <b>33</b> |
| <b>Figure S33. Mass spectrum of compound 10.....</b>                 | <b>34</b> |
| <b>Figure S34. <math>^1\text{H}</math>NMR of compound 13.....</b>    | <b>35</b> |
| <b>Figure S35. <math>^{13}\text{C}</math>NMR of compound 13.....</b> | <b>36</b> |
| <b>Figure S36. Mass spectrum of compound 13.....</b>                 | <b>37</b> |
| <b>Figure S37. <math>^1\text{H}</math>NMR of compound 14.....</b>    | <b>38</b> |
| <b>Figure S38. <math>^{13}\text{C}</math>NMR of compound 14.....</b> | <b>39</b> |
| <b>Figure S39. Mass spectrum of compound 14.....</b>                 | <b>40</b> |
| <b>Figure S40. <math>^1\text{H}</math>NMR of compound 15.....</b>    | <b>41</b> |
| <b>Figure S41. <math>^{13}\text{C}</math>NMR of compound 15.....</b> | <b>42</b> |
| <b>Figure S42: Raw Images of western blots.....</b>                  | <b>43</b> |

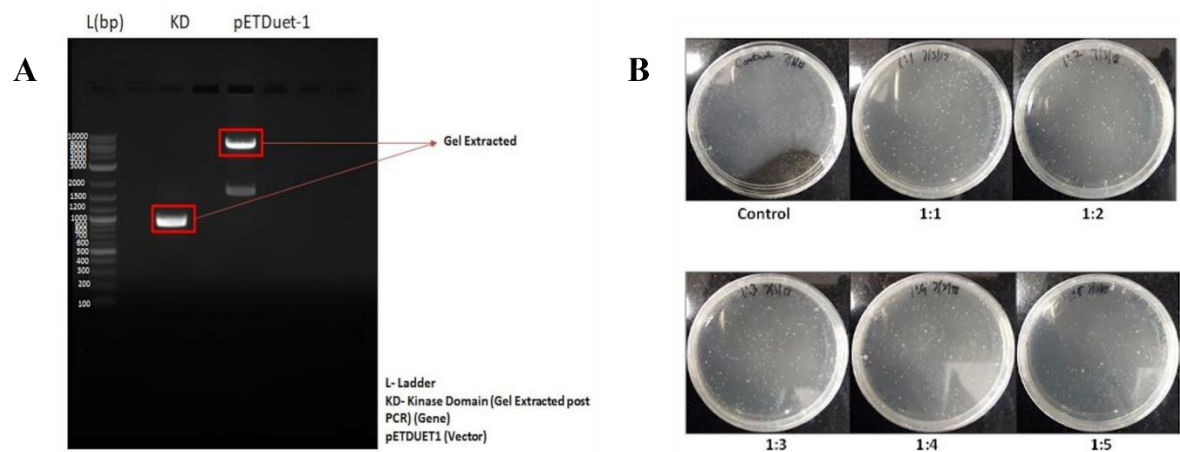

**Figure S1: PCR amplification and ligation of TLK-kinase domain** (A) PCR amplification and restriction digestion of hTLK1B\_KD and pETDUET-1 vector. Lane 1: Ladder mark, Lane 2 (KD) describes the PCR amplification of 919 bp of hTLK1B\_KD using pETDUET-KD\_FOR, 5'-ACAGAGGATCCAAAGGACCACCCGACCCTG-3' and pETDUET-KD\_REV, 5'-TCGTTGCTonTCGTCGCCATTGGACAAGATCTTAAGACGACA-3' and followed by its restriction digestion using BamHI and EcoRI restriction enzymes, Lane 3 (pETDuet-1) describes the restriction digestion of the pTDUET-1 vector. The digested samples were extracted for ligation. The samples were run on 1% Agarose gel. (B) Bacterial transformation of the ligated product. The ligation was carried out in different vector: insert ratios (1:1-1:5). The ligation product was transformed into *Escherichia coli* DH5 $\alpha$ <sup>TM</sup> cells. Individual colonies were picked to screen for positive clones from each ratio. Reaction mixture without insert was used as a re-ligation control to analyse the frequency of re-ligation of vector backbone to itself. 2-3 colonies of self-ligated vectors were observed.

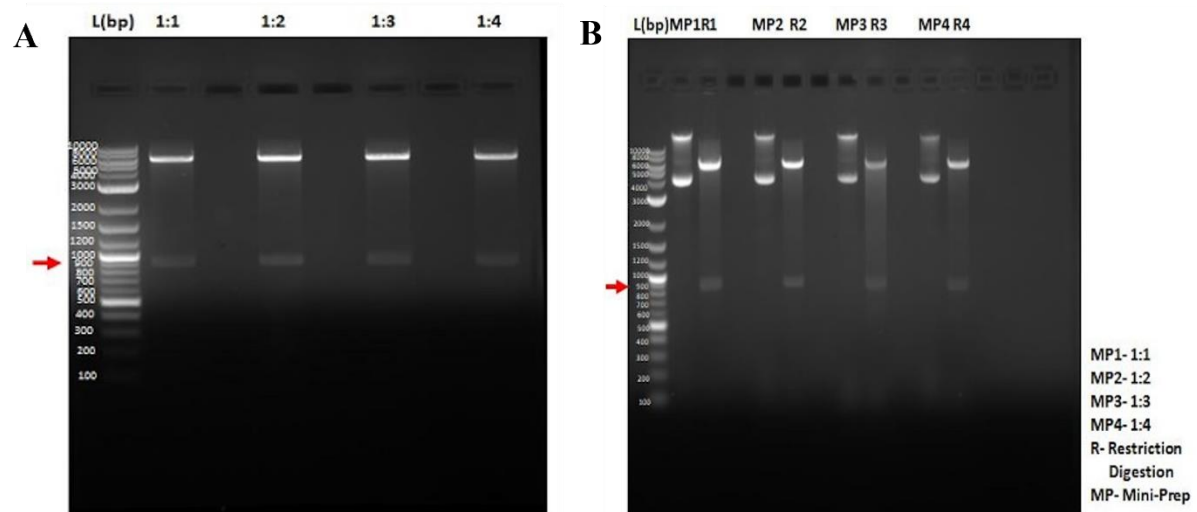

**Figure S2: Restriction digestion of positive ligated colonies** (a) First screening of the positive clones (Restriction digestion). The restriction digestion pattern was obtained as expected at 919 bp ladder mark (red arrow). All were positive clones. (b) Re-confirms the positive clones after plasmid scale-up. Undigested vector was used as a control. Restriction digestion yielded an

expected banding pattern of hTLK1B\_KD at 919 bp ladder mark (red arrow). All were positive clones.

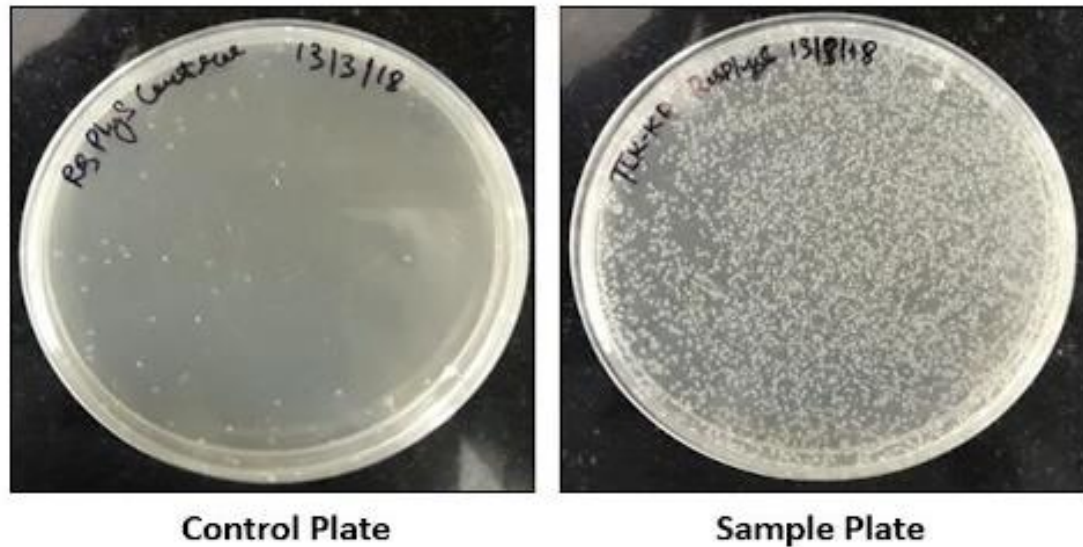

**Figure S3:** Bacterial transformation of constructed plasmid. The confirmed cloned plasmid was transformed into *Escherichia coli* Rosetta Gami 2™ (DE3) pLysS cells for the expression studies and other downstream applications. Control showed no colonies (the visible air bubbles are artifacts occurred as a result of preparative procedures)

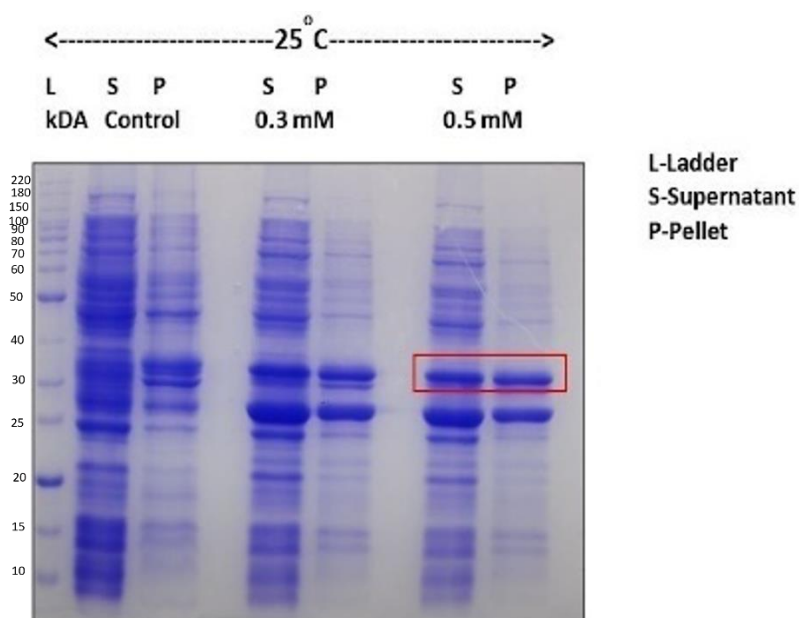

**Figure S4:** Optimisation of hTLK1B-KD expression. 12% SDS-PAGE gel image of the expression tests optimised at 25°C and at different IPTG concentrations (0.3mM and 0.5mM). Control was kept uninduced. The abbreviations are as follows, S, Supernatant; P, Pellet.

**FPLC - Chromatogram**  
**(50mM Tris-Cl (pH 8.0), 50mM NaCl, 0.2mM TCEP)**

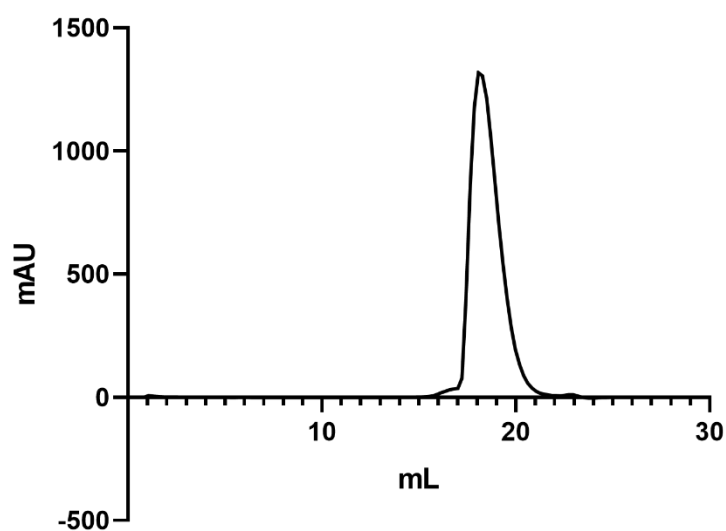

**Figure S5:** Size exclusion chromatography using FPLC of hTLK1B\_KD. The concentrated protein was buffer-exchanged in 50 mM Tris-Cl (pH-8.0), 50 mM NaCl and 0.2 mM TCEP.

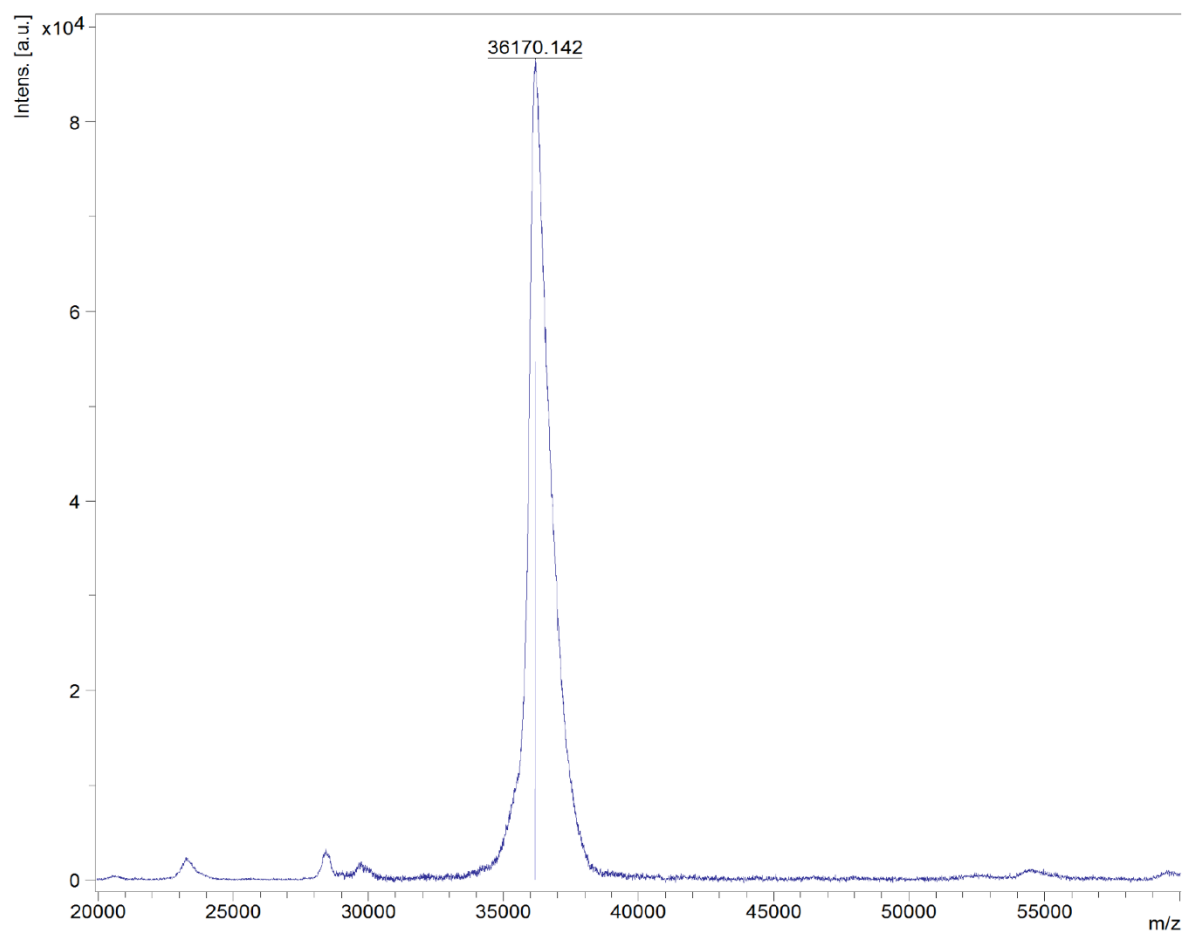

#### Acquisition Parameter

|                                       |                                                 |
|---------------------------------------|-------------------------------------------------|
| Date of acquisition                   | 2019-06-10T15:13:28.477+05:30                   |
| Acquisition method name               | D:\Methods\flexControlMethods\LP_30-210_kDa.par |
| Acquisition operation mode            | Linear                                          |
| Voltage polarity                      | POS                                             |
| Number of shots                       | 1500                                            |
| Name of spectrum used for calibration |                                                 |
| Calibration reference list used       | Protein_BSA                                     |

**Figure S6:** Mass spectrometry analysis of recombinant fusion protein. MALDI-TOF mass spectrometry analysis of hTLK1B-KD: The molecular weight of the protein was found to be 36.1 KDa, which was in agreement with the theoretically calculated molecular weight of monomeric TLK1B-KD.



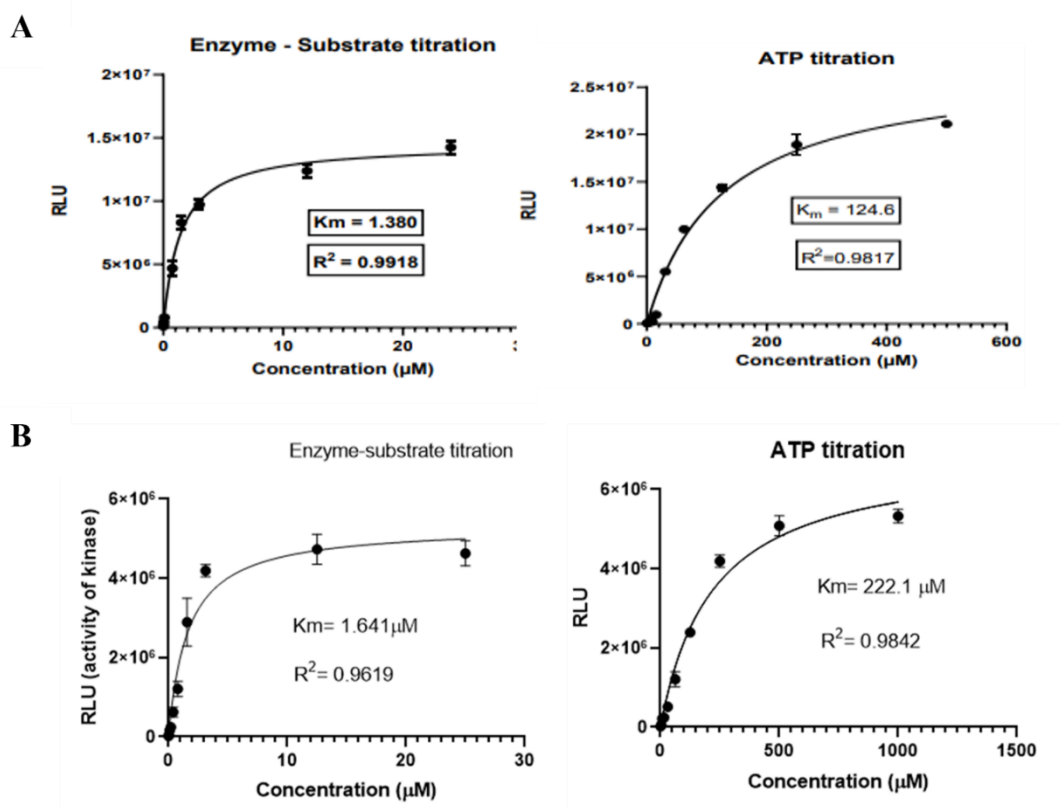

**Figure S8: The titration curves with Histone and Nek1 as a substrate.** (A) Determination of the  $K_m$  value for Histone and ATP. The serial, twofold dilutions of ATP and kinase substrate were made respectively across the plate using 1X Kinase Reaction Buffer. The  $K_m$  value of Histone H3 was found to be 1.38  $\mu\text{M}$ . (B) Determination of the  $K_m$  value for Nek1 and ATP. The serial, twofold dilutions of ATP and kinase substrate were made respectively across the plate using 1X Kinase Reaction Buffer. The  $K_m$  value of Nek1 was found to be 1.64  $\mu\text{M}$ .

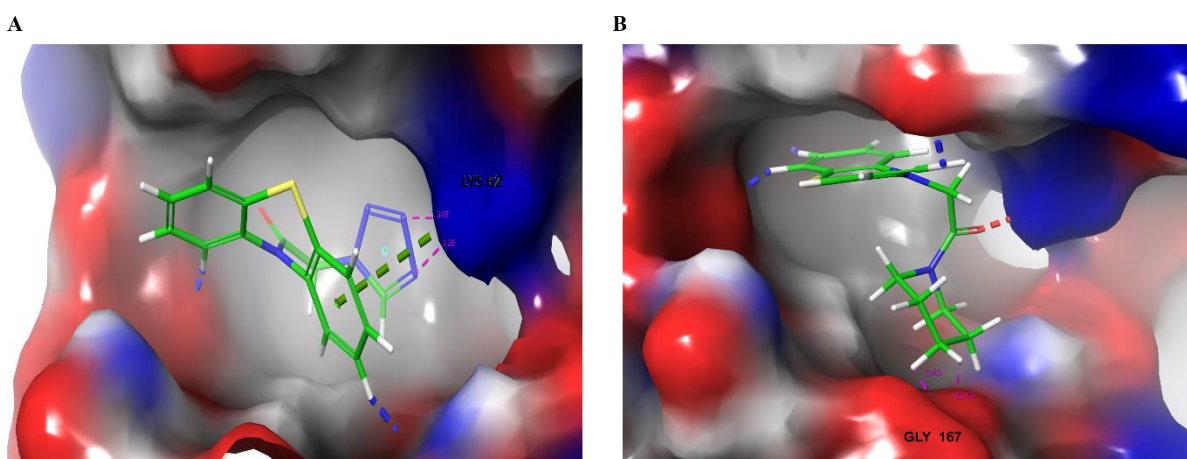

**Figure S9: Docking studies of ligands with TLK-kinase domain.** The docking pose of compound **9** (A) and compound **12** (B) in the ATP binding site. The tetrazole moiety forms an electrostatic interaction with Lys 62 ( $\sim 3.0 \text{ \AA}$ ) and piperidine forms with Gly 167 ( $\sim 2.7 \text{ \AA}$ ).

**Table S1: ADME and drug-likeness of synthesized compounds**

| Molecule | Consensus Log P | ESOL Class         | Ali Class          | GI absorption | BBB permeant | Pgp substrate | CYP1A2 inhibitor | CYP2C19 inhibitor | CYP2C9 inhibitor | CYP2D6 inhibitor | CYP3A4 inhibitor | Bio-availability |
|----------|-----------------|--------------------|--------------------|---------------|--------------|---------------|------------------|-------------------|------------------|------------------|------------------|------------------|
| 1        | 3.89            | Moderately soluble | Moderately soluble | High          | Yes          | Yes           | Yes              | Yes               | No               | Yes              | Yes              | 0.55             |
| 2        | 4.15            | Moderately soluble | Moderately soluble | High          | Yes          | Yes           | Yes              | Yes               | No               | Yes              | No               | 0.55             |
| 3        | 2.83            | Soluble            | Moderately soluble | High          | Yes          | Yes           | Yes              | Yes               | No               | Yes              | Yes              | 0.55             |
| 4        | 2.41            | Soluble            | Soluble            | High          | Yes          | Yes           | Yes              | No                | No               | Yes              | Yes              | 0.55             |
| 5        | 2.74            | Soluble            | Soluble            | High          | Yes          | Yes           | Yes              | Yes               | Yes              | Yes              | Yes              | 0.55             |
| 6        | 3.59            | Moderately soluble | Moderately soluble | High          | Yes          | Yes           | Yes              | Yes               | Yes              | Yes              | Yes              | 0.55             |
| 7        | 2.69            | Soluble            | Soluble            | High          | Yes          | Yes           | No               | Yes               | Yes              | Yes              | Yes              | 0.55             |
| 8        | 3.3             | Moderately soluble | Moderately soluble | High          | Yes          | Yes           | Yes              | Yes               | Yes              | Yes              | Yes              | 0.55             |
| 9        | 2.2             | Soluble            | Soluble            | High          | No           | No            | Yes              | Yes               | No               | No               | No               | 0.55             |
| 10       | 3.28            | Moderately soluble | Moderately soluble | High          | Yes          | Yes           | Yes              | Yes               | Yes              | Yes              | Yes              | 0.55             |
| 11       | 2.67            | Soluble            | Soluble            | High          | Yes          | Yes           | Yes              | Yes               | Yes              | Yes              | Yes              | 0.55             |
| 12       | 3.54            | Moderately soluble | Moderately soluble | High          | Yes          | Yes           | Yes              | Yes               | Yes              | Yes              | Yes              | 0.55             |
| 13       | 2.19            | Soluble            | Soluble            | High          | Yes          | Yes           | No               | Yes               | No               | Yes              | Yes              | 0.55             |
| 14       | 1.86            | Soluble            | Soluble            | High          | Yes          | Yes           | No               | Yes               | Yes              | Yes              | Yes              | 0.55             |
| 15       | 2.72            | Moderately soluble | Soluble            | High          | Yes          | Yes           | No               | Yes               | Yes              | Yes              | Yes              | 0.55             |
| 16       | 2.59            | Soluble            | Soluble            | High          | Yes          | No            | Yes              | Yes               | No               | Yes              | Yes              | 0.55             |
| 17       | 3.42            | Moderately soluble | Moderately soluble | High          | Yes          | No            | Yes              | Yes               | No               | Yes              | Yes              | 0.55             |
| 18       | 2.09            | Soluble            | Soluble            | High          | Yes          | No            | Yes              | Yes               | Yes              | Yes              | Yes              | 0.55             |
| 19       | 2.96            | Moderately soluble | Moderately soluble | High          | Yes          | No            | Yes              | Yes               | Yes              | Yes              | Yes              | 0.55             |
| J54      | 3.27            | Moderately soluble | Moderately soluble | High          | Yes          | Yes           | Yes              | No                | No               | Yes              | Yes              | 0.55             |

# Analytical Data: <sup>1</sup>HNMR, <sup>13</sup>CNMR, and mass spectrum of the compounds

Figure S10: <sup>1</sup>H NMR of Compound 1

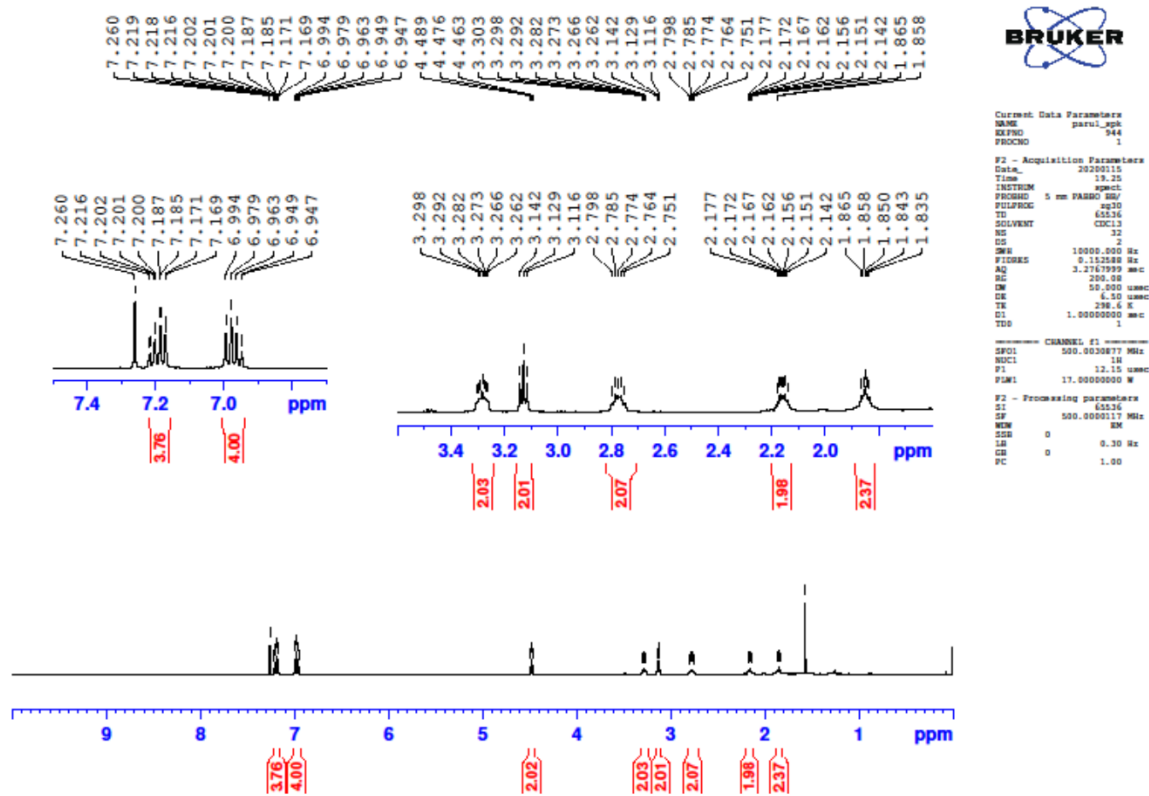

Figure S11:  $^{13}\text{C}$  NMR of compound 1

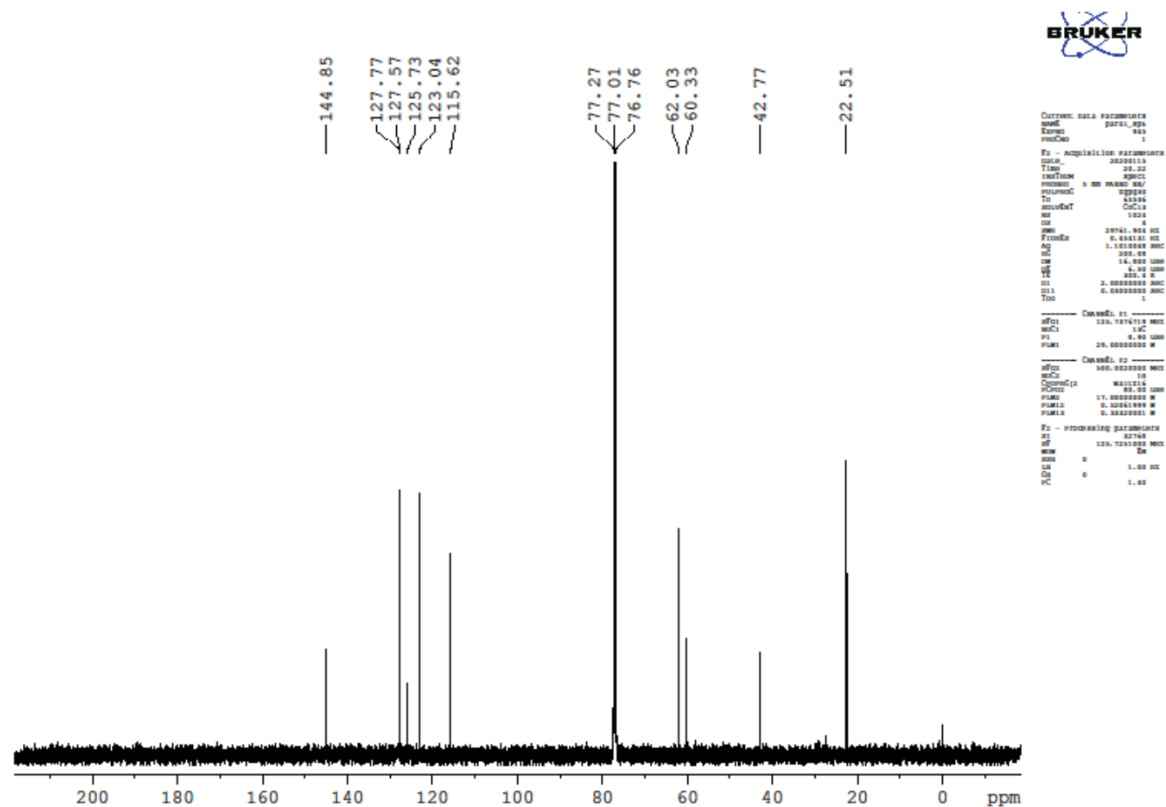

**Figure S12: Mass of compound 1**

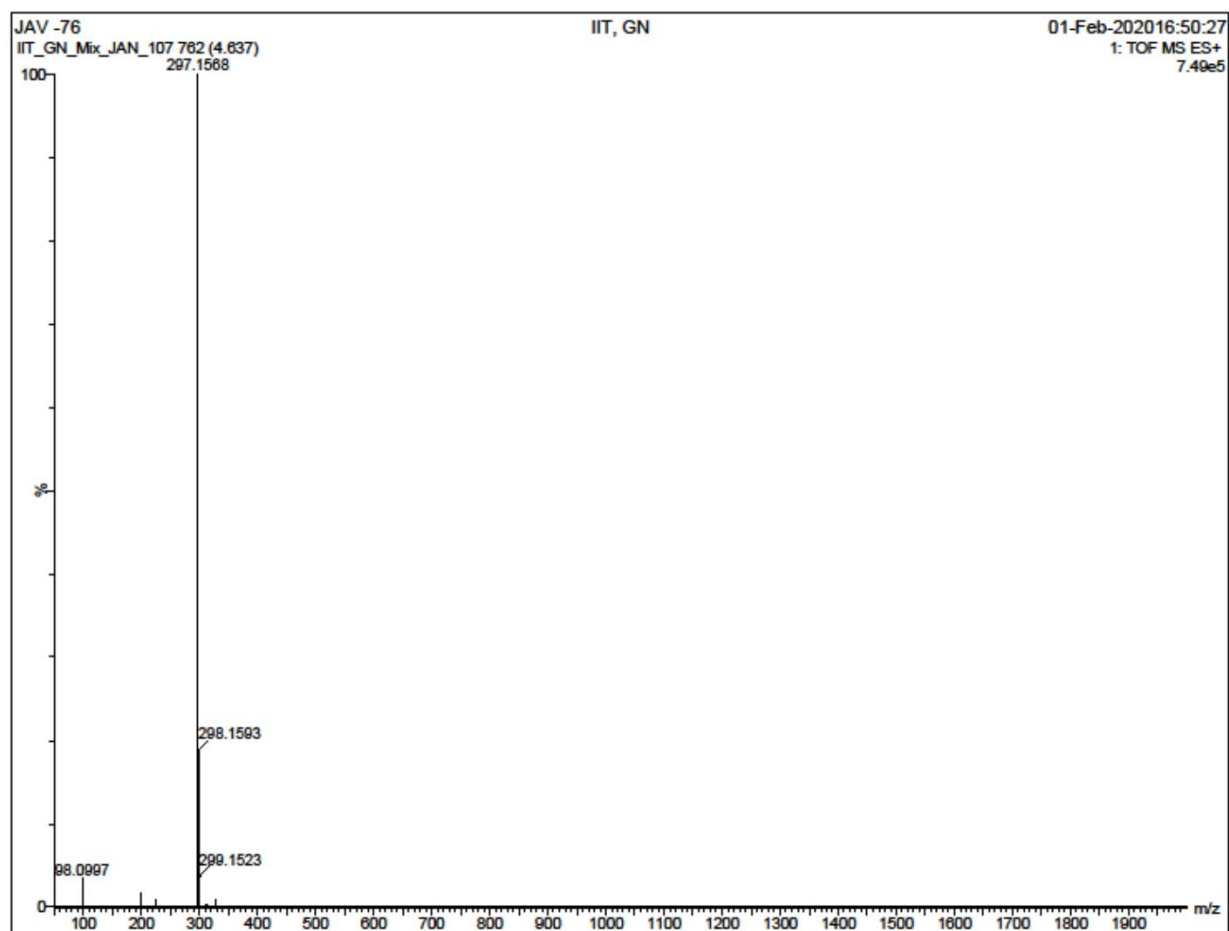

Figure S13:  $^1\text{H}$  NMR of compound 2

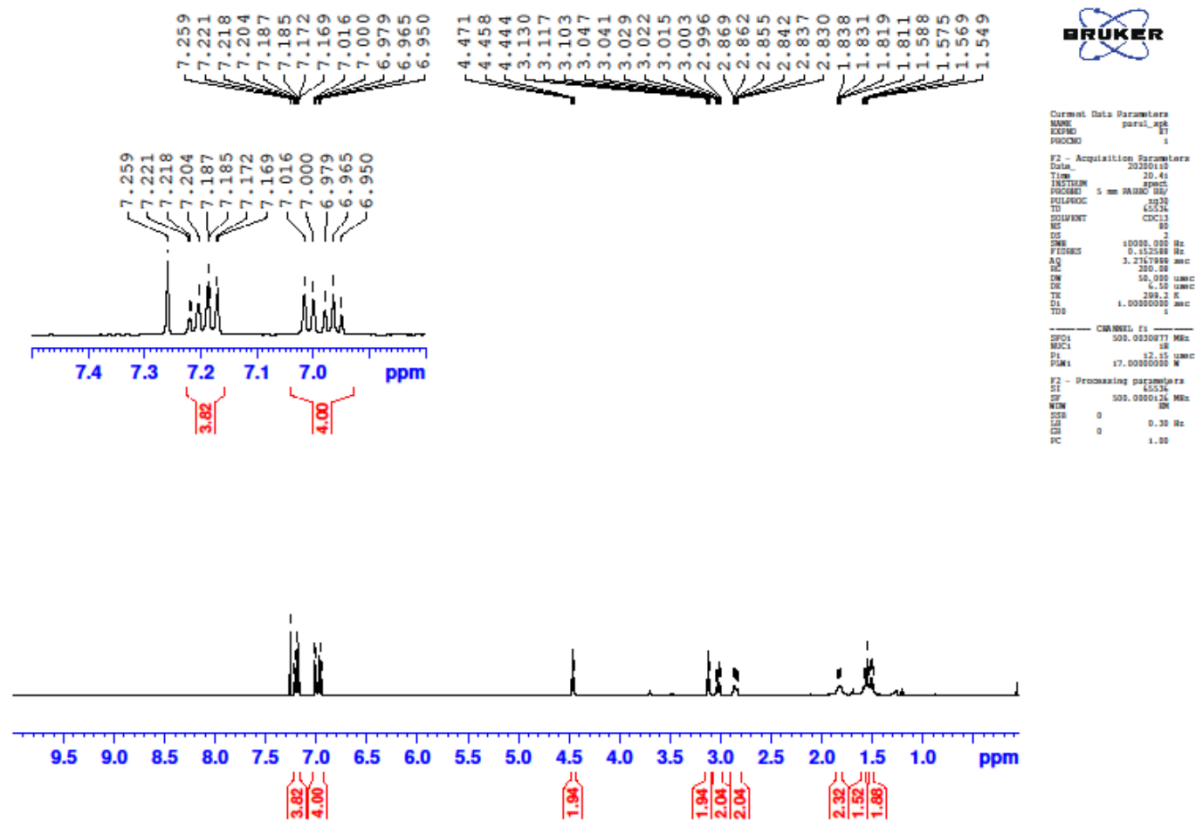

Figure S14:  $^{13}\text{C}$  NMR of compound 2

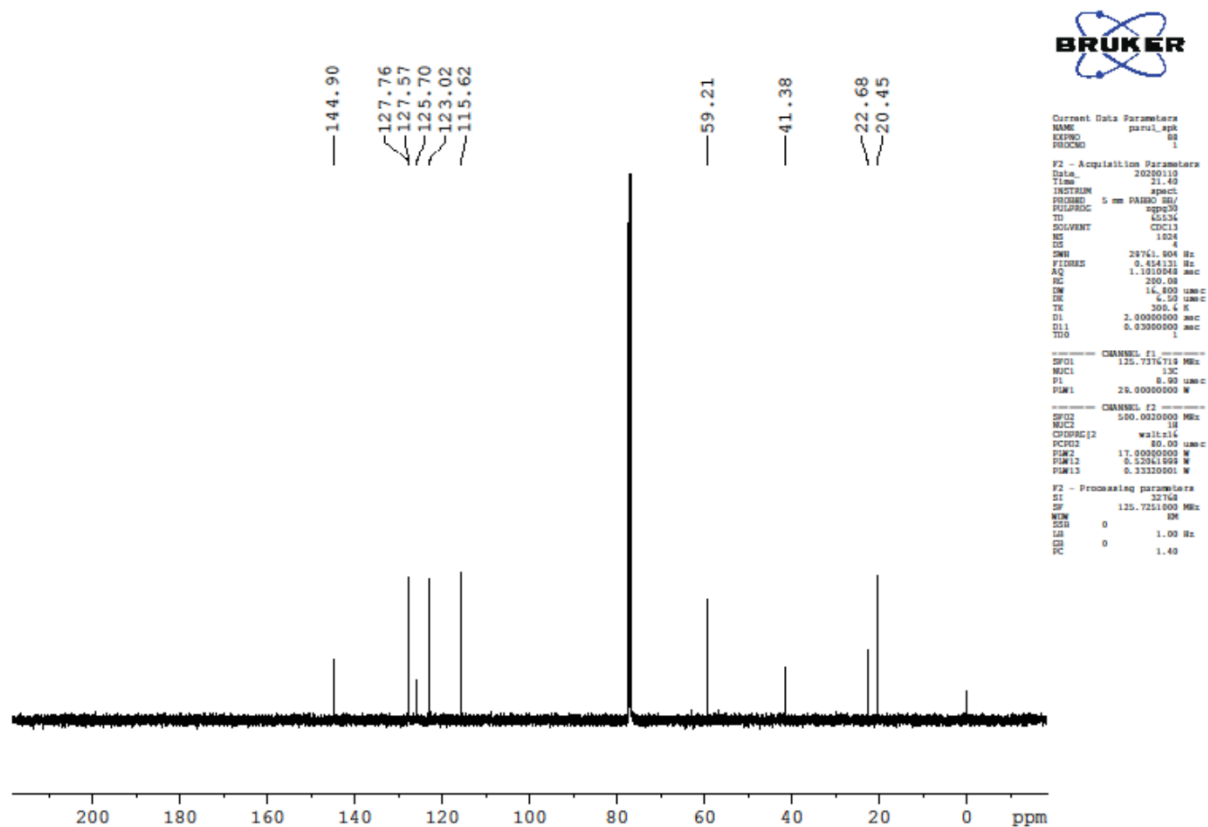

**Figure S15: Mass of compound 2**

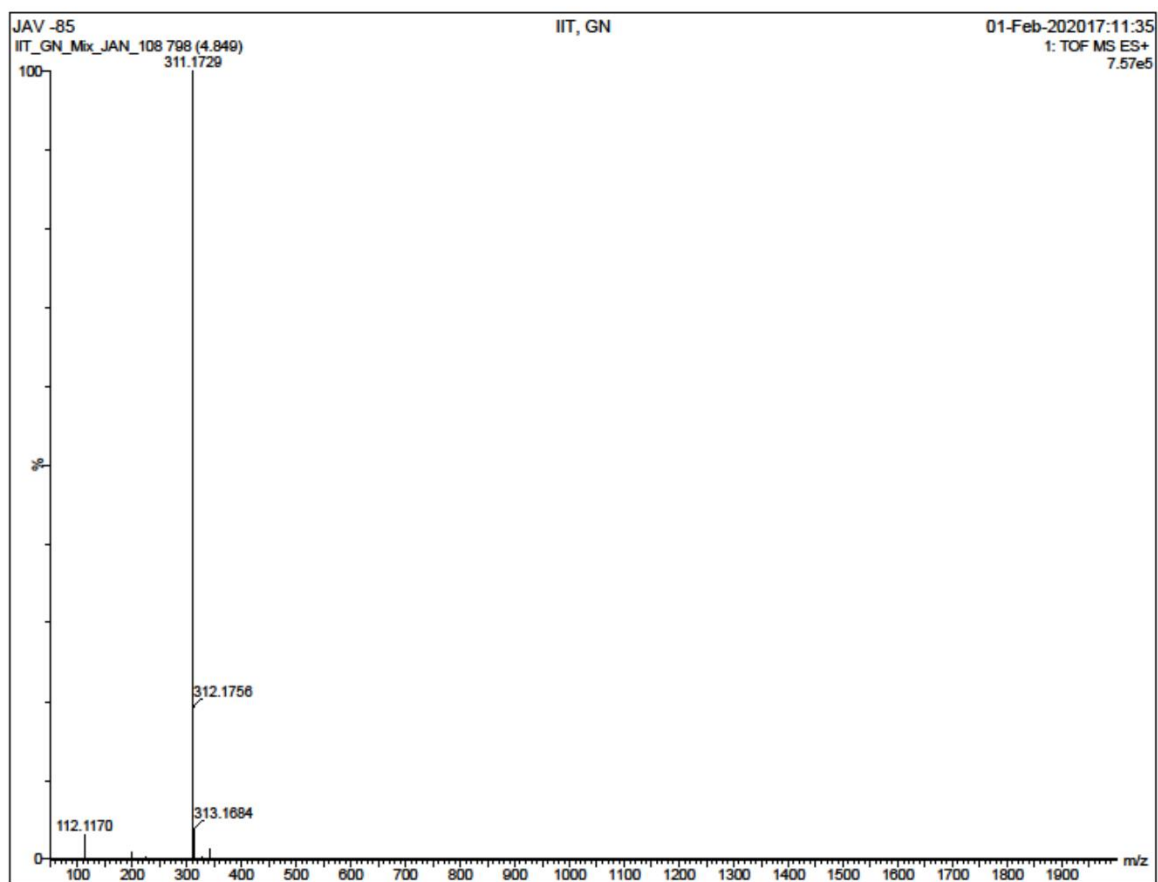

<sup>1</sup>H NMR spectrum of compound 10 in CDCl<sub>3</sub>. The spectrum shows peaks in the aromatic region (6.8-7.2 ppm) and aliphatic region (3.0-4.4 ppm). Integration values are provided for several peaks.

Chemical structure of compound 10 is shown above the spectrum:

O=C1C(=O)N(C1)C2=CC=C(C=C2)C3=CC=CC=C3

Peak list (ppm):

- 7.191, 7.136, 7.119, 7.103
- 6.947, 6.931, 6.910, 6.896
- 4.401, 4.388, 4.374
- 3.061, 3.048, 3.034

Integration values (red):

- 3.91 (aromatic region, 7.1-7.2 ppm)
- 3.99 (aromatic region, 6.8-7.0 ppm)
- 3.91, 3.99 (aromatic region, 6.8-7.2 ppm)
- 2.00 (aliphatic region, 4.3-4.4 ppm)
- 0.70 (aliphatic region, 3.0-3.1 ppm)
- 2.00 (aliphatic region, 3.0-3.1 ppm)

[illegible]

Figure S17:  $^{13}\text{C}$  NMR of compound 3

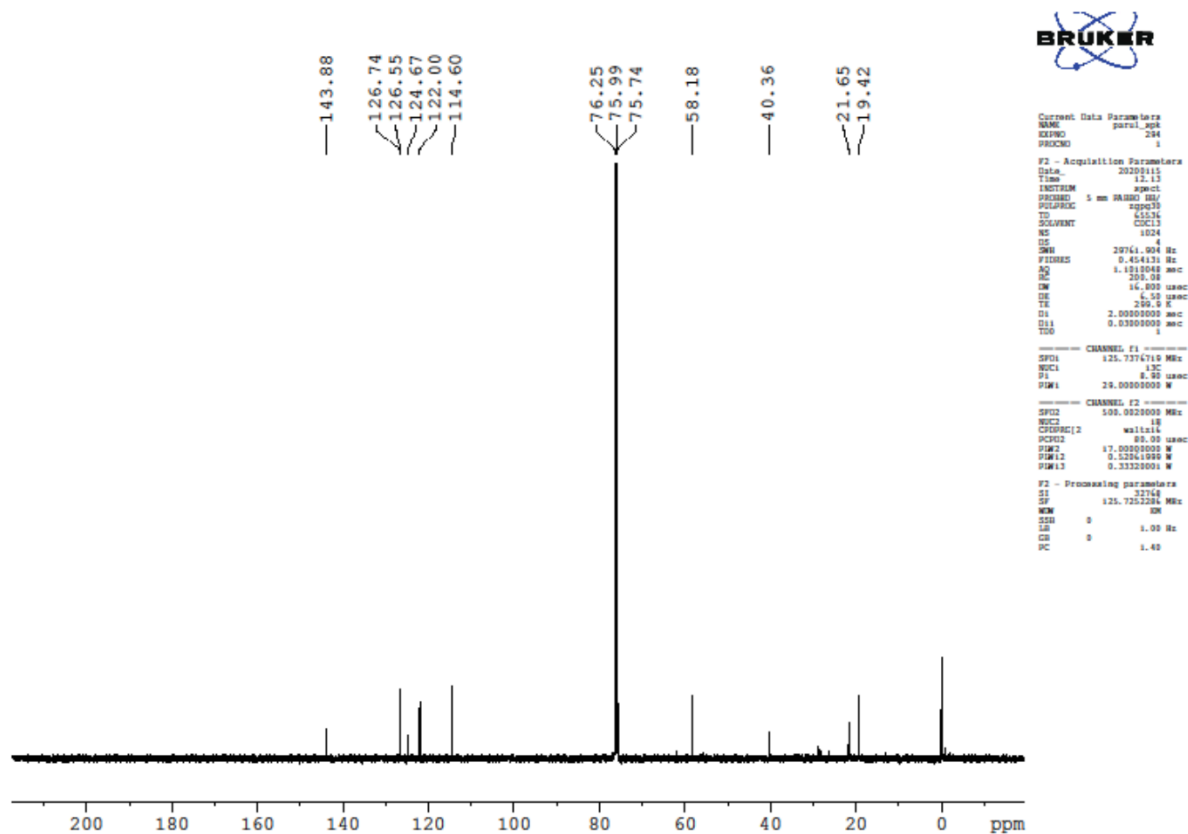

**Figure S18: Mass of compound 3**

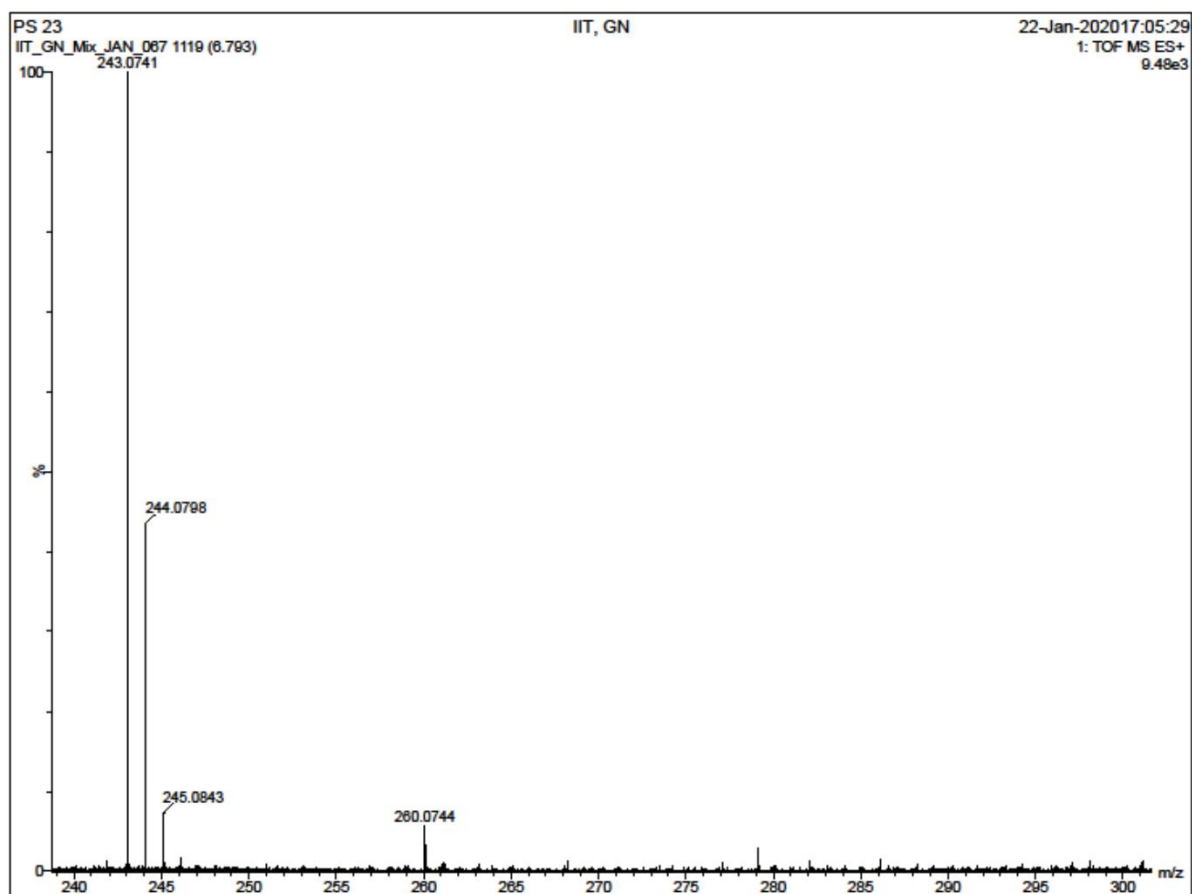

**Figure S19:  $^1\text{H}$  NMR of compound 4**

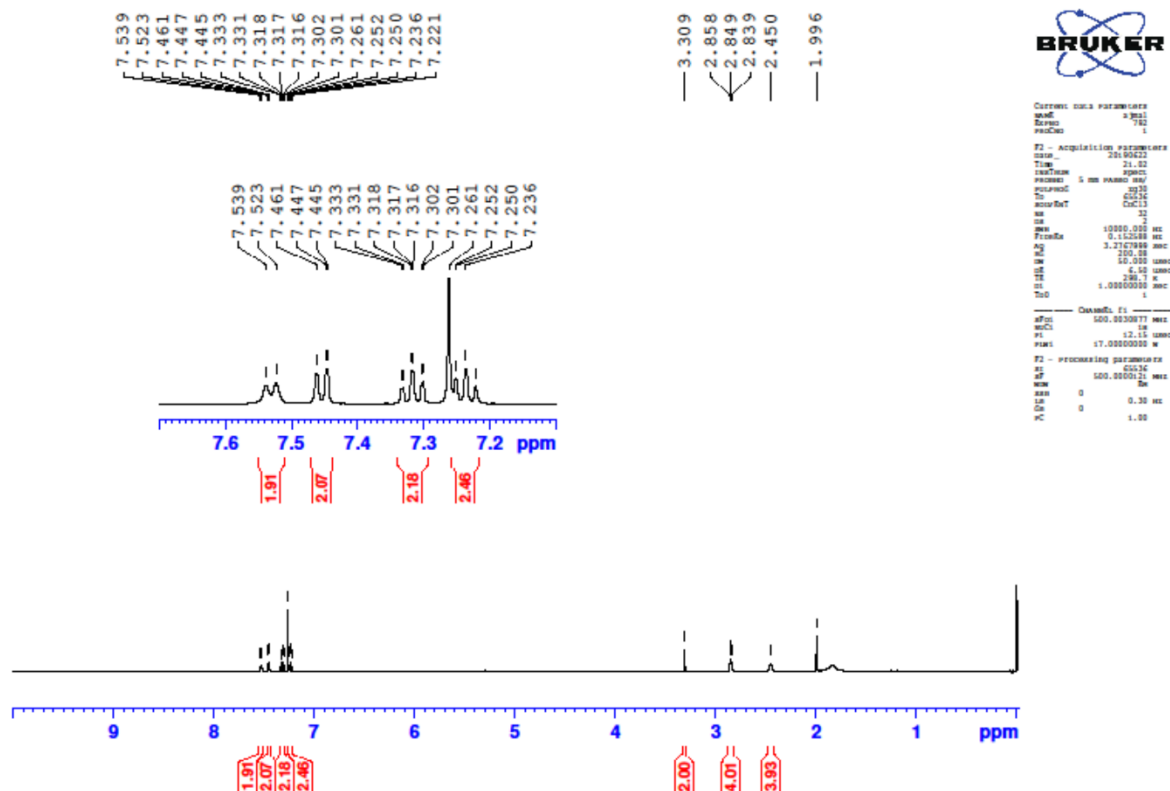

Figure S20:  $^{13}\text{C}$  NMR of compound 4

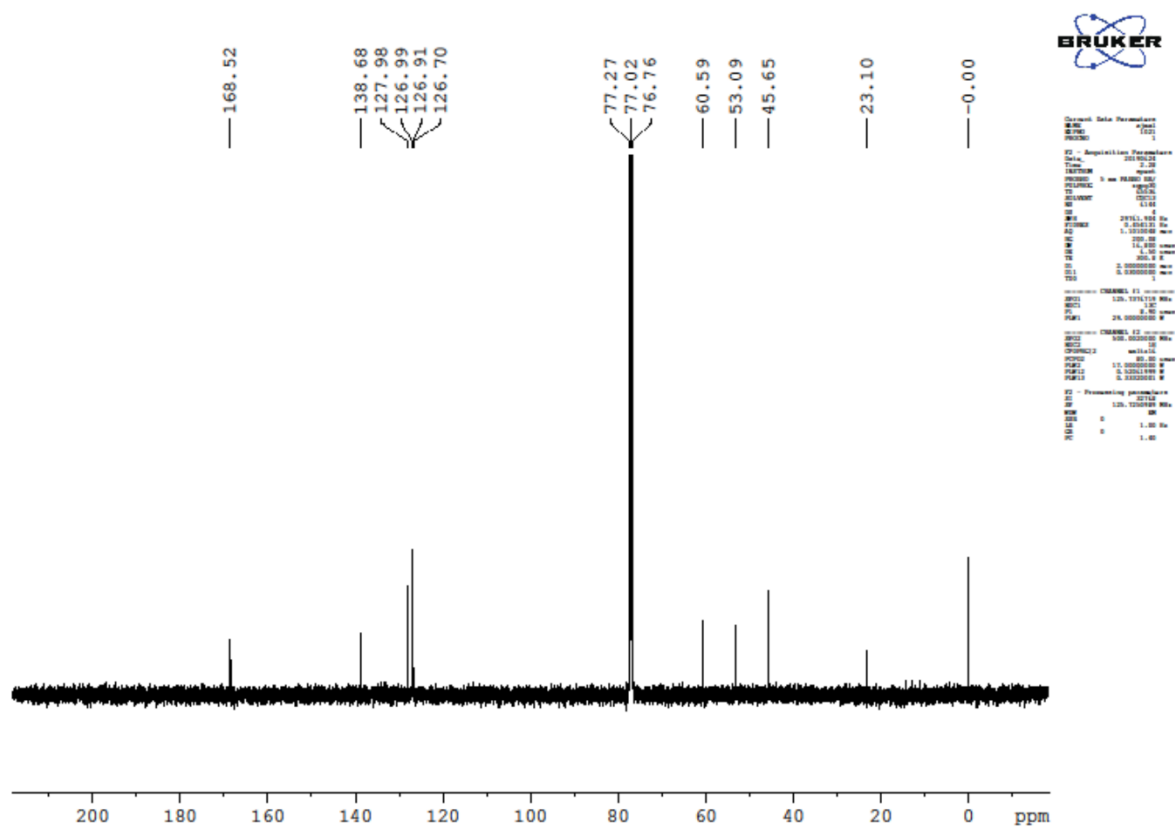

**Figure S21: Mass of compound 4**

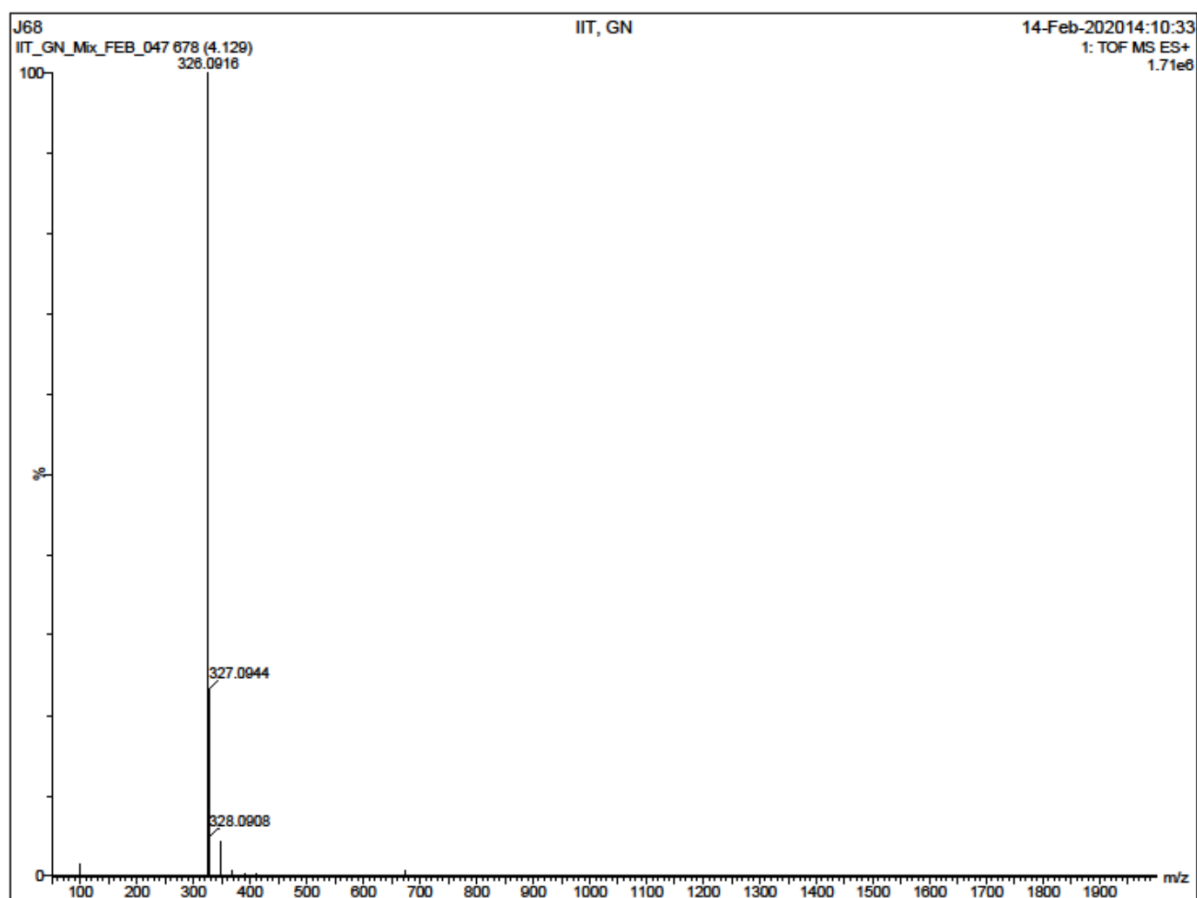

Figure S22:  $^1\text{H}$  NMR of compound 7

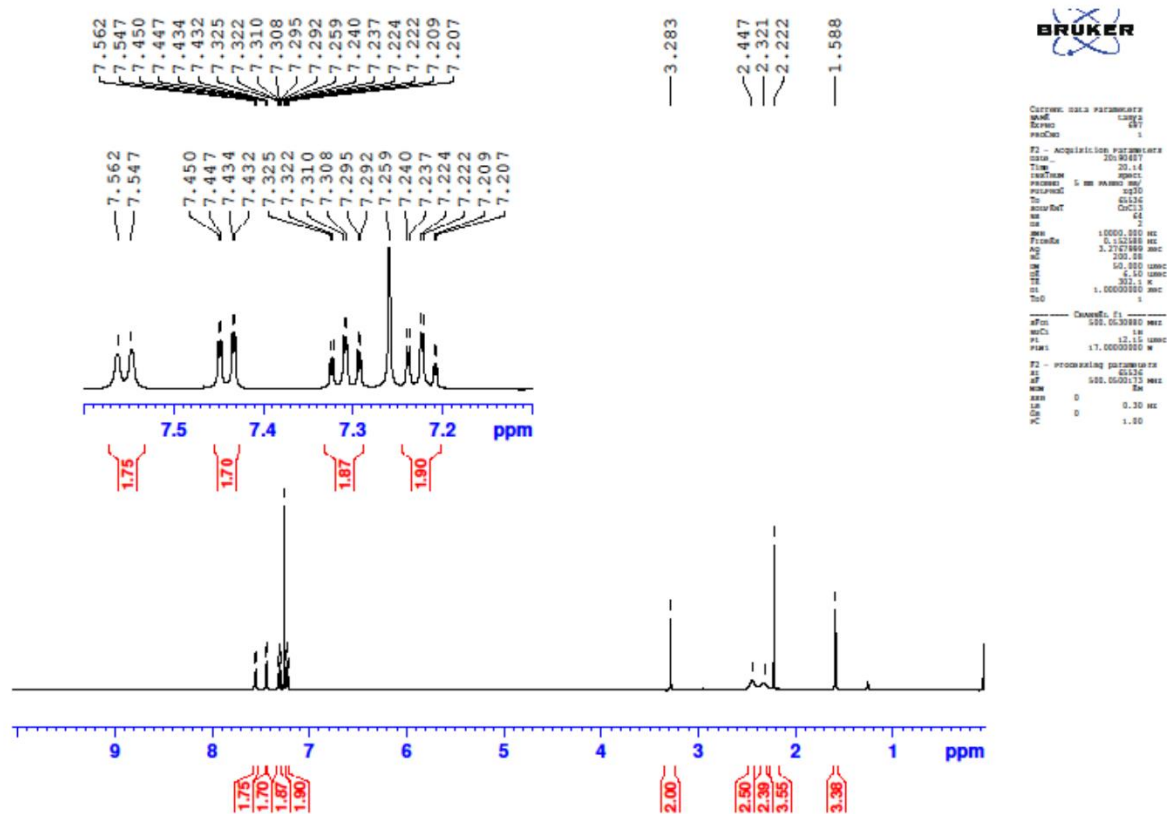

Figure S23:  $^{13}\text{C}$  NMR of compound 7

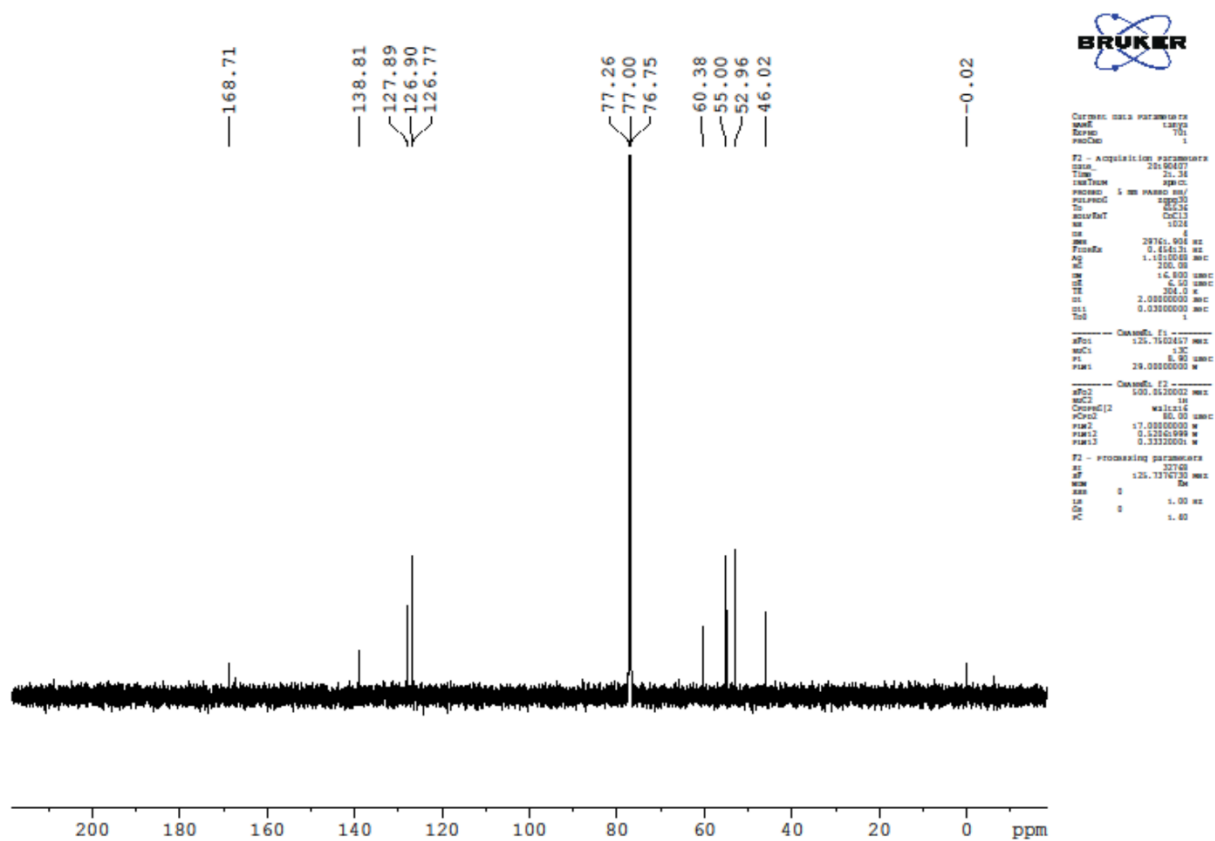

**Figure S24: Mass of compound 7**

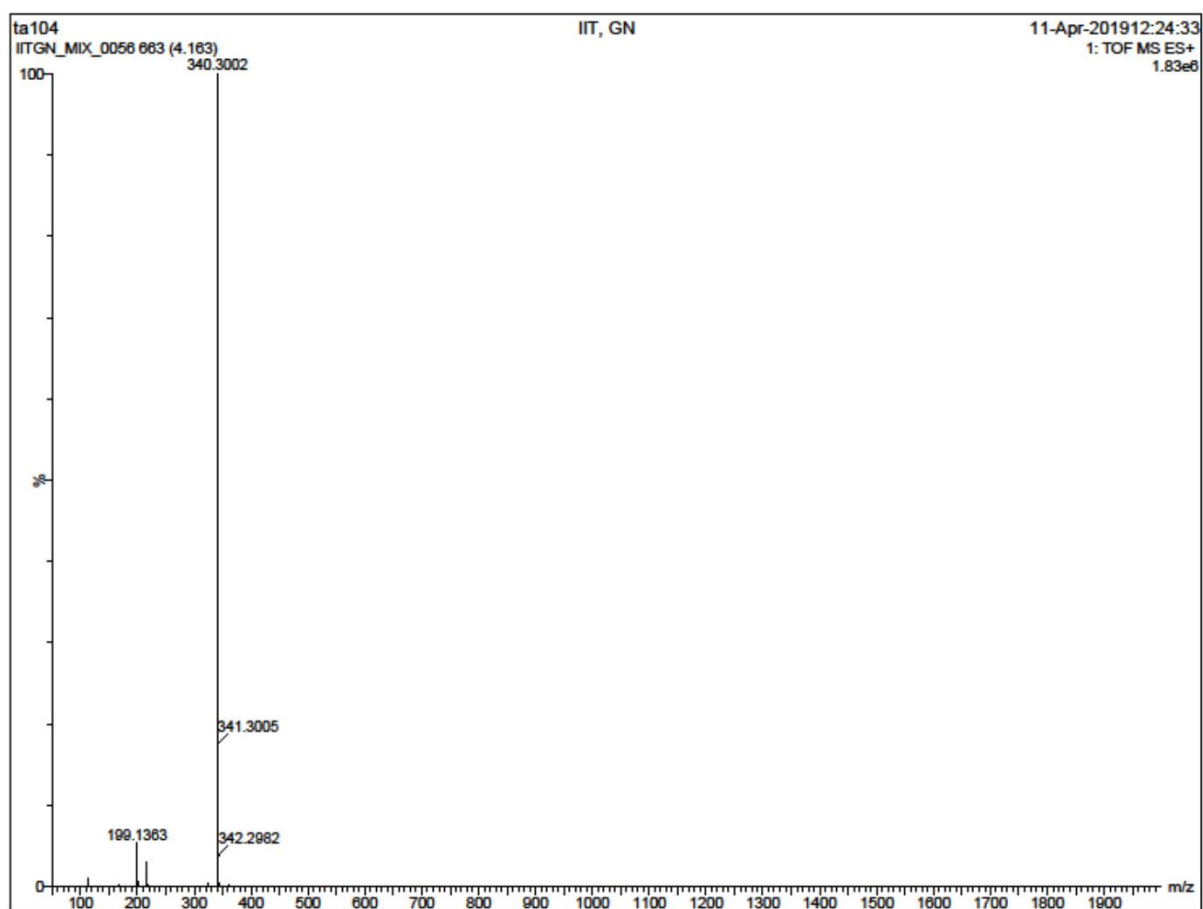

[illegible]

Figure S26:  $^{13}\text{C}$  NMR of compound 8

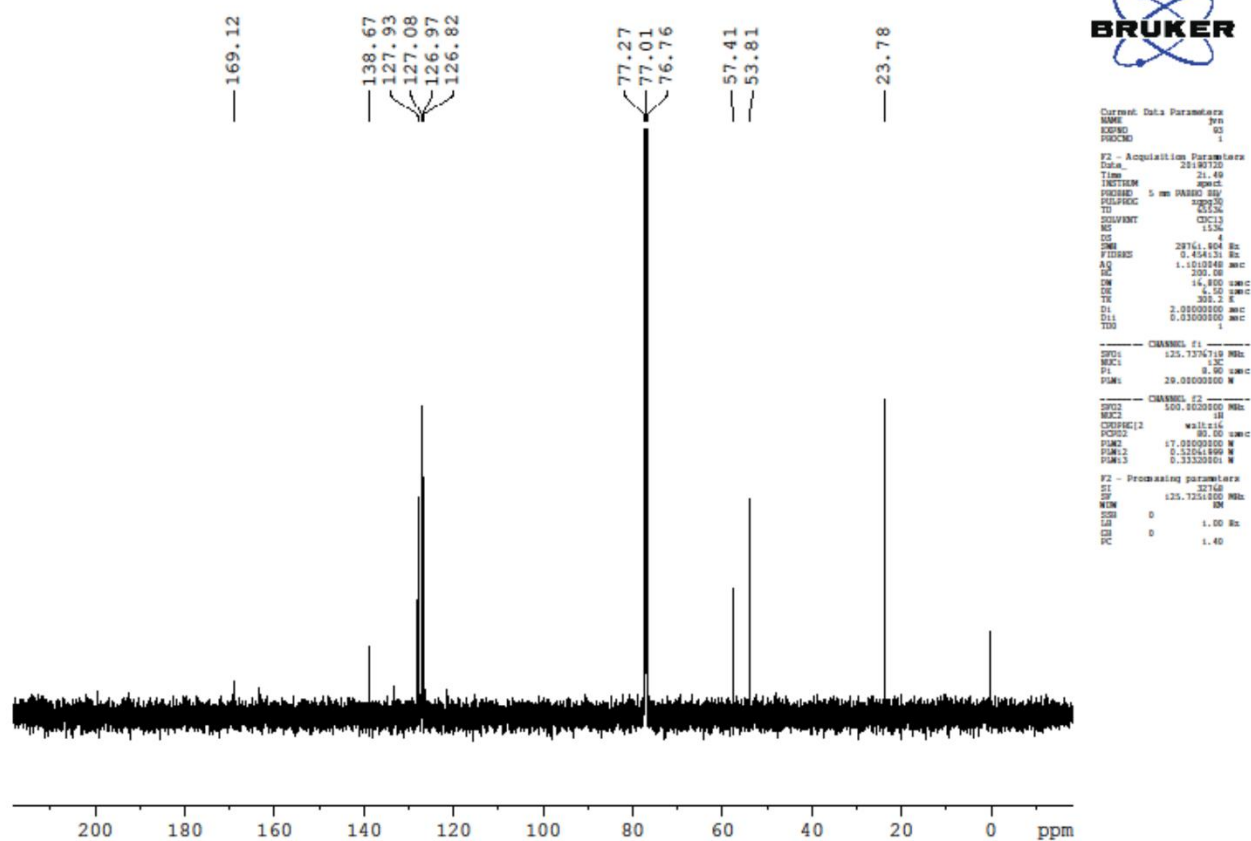

Figure S27: Mass of compound 8

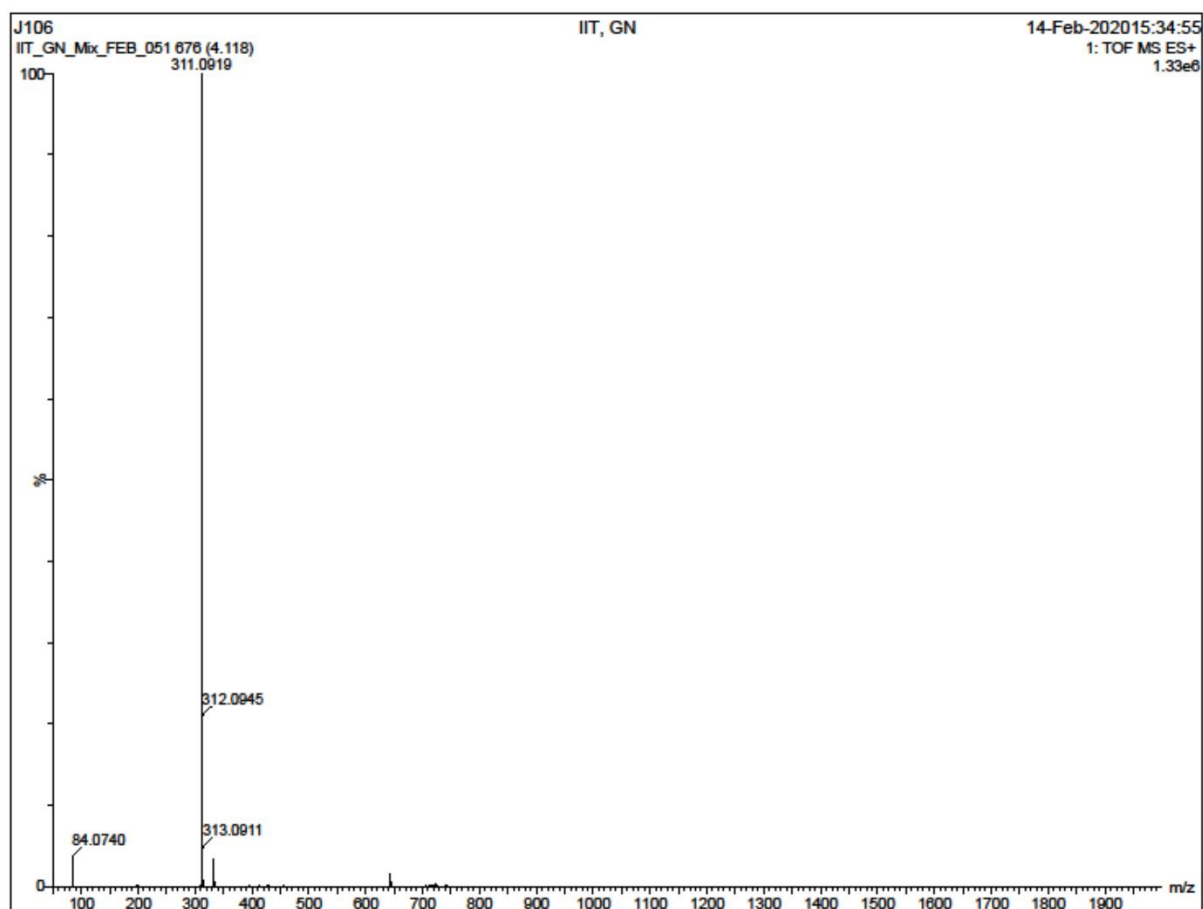

Figure S28:  $^1\text{H}$  NMR of compound 9

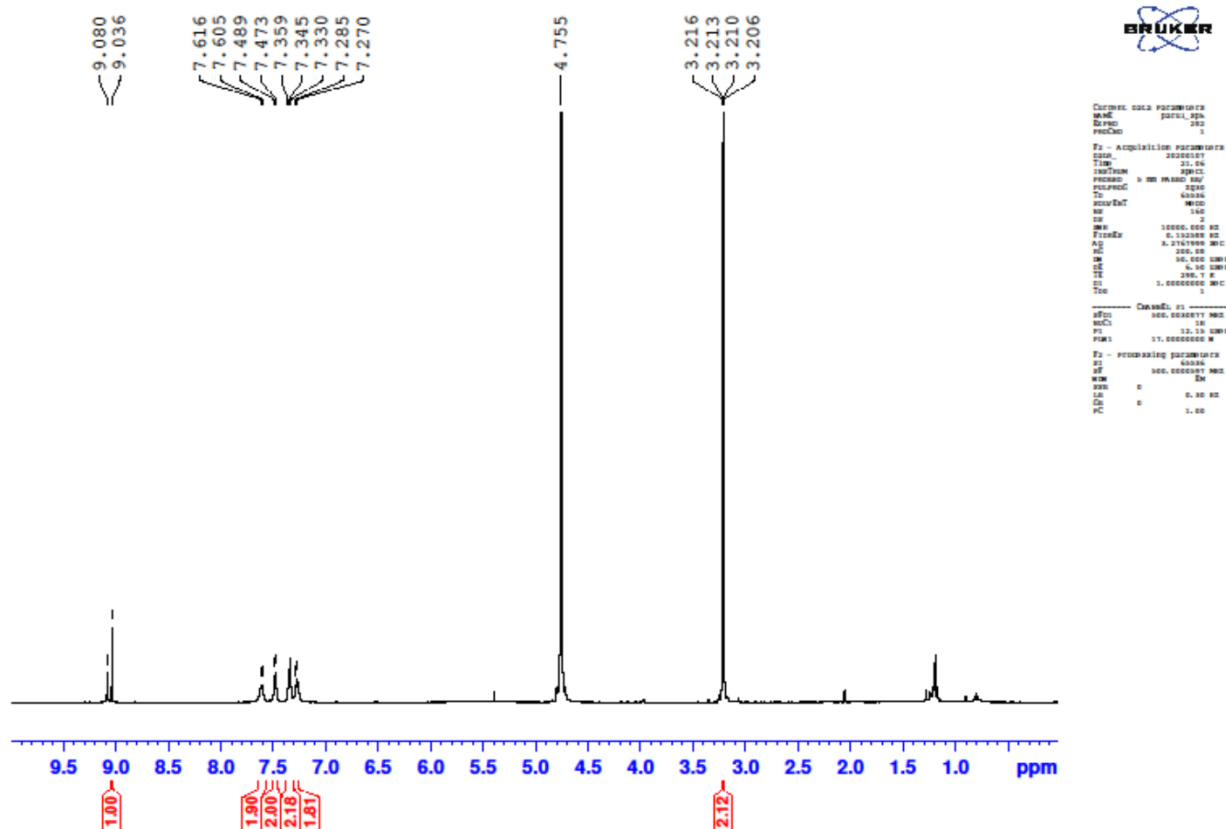

Figure S29:  $^{13}\text{C}$  NMR of compound 9

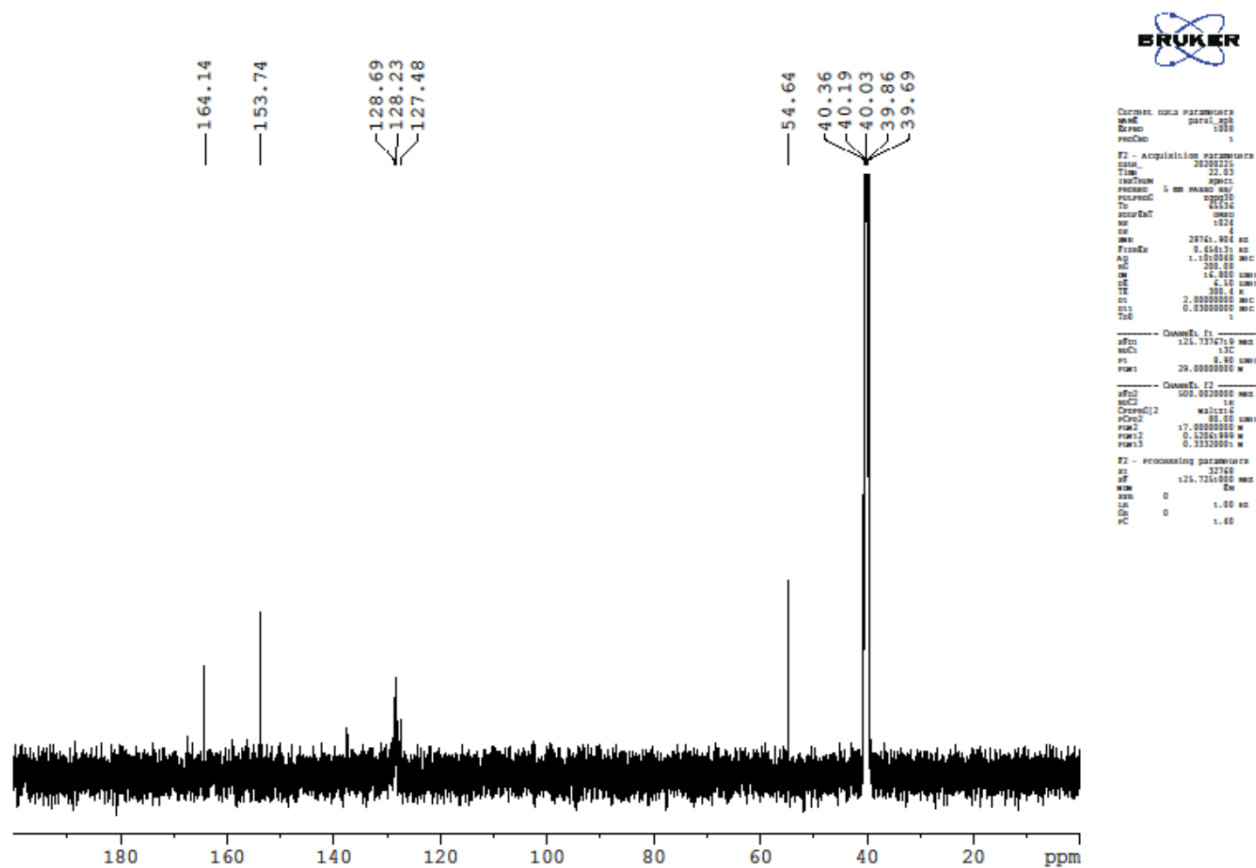

**Figure S30: Mass of compound 9**

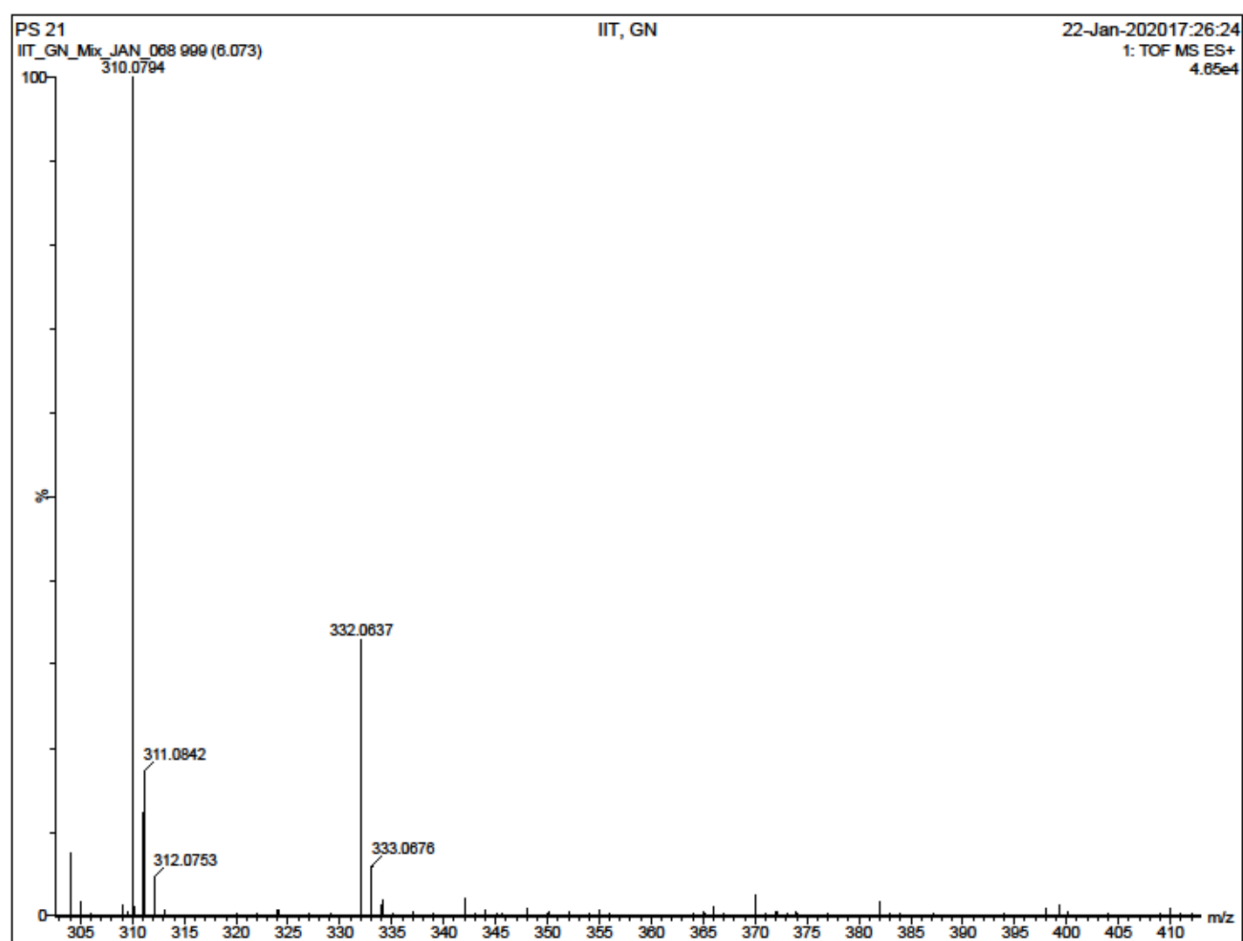

Figure S31:  $^1\text{H}$  NMR of compound 10

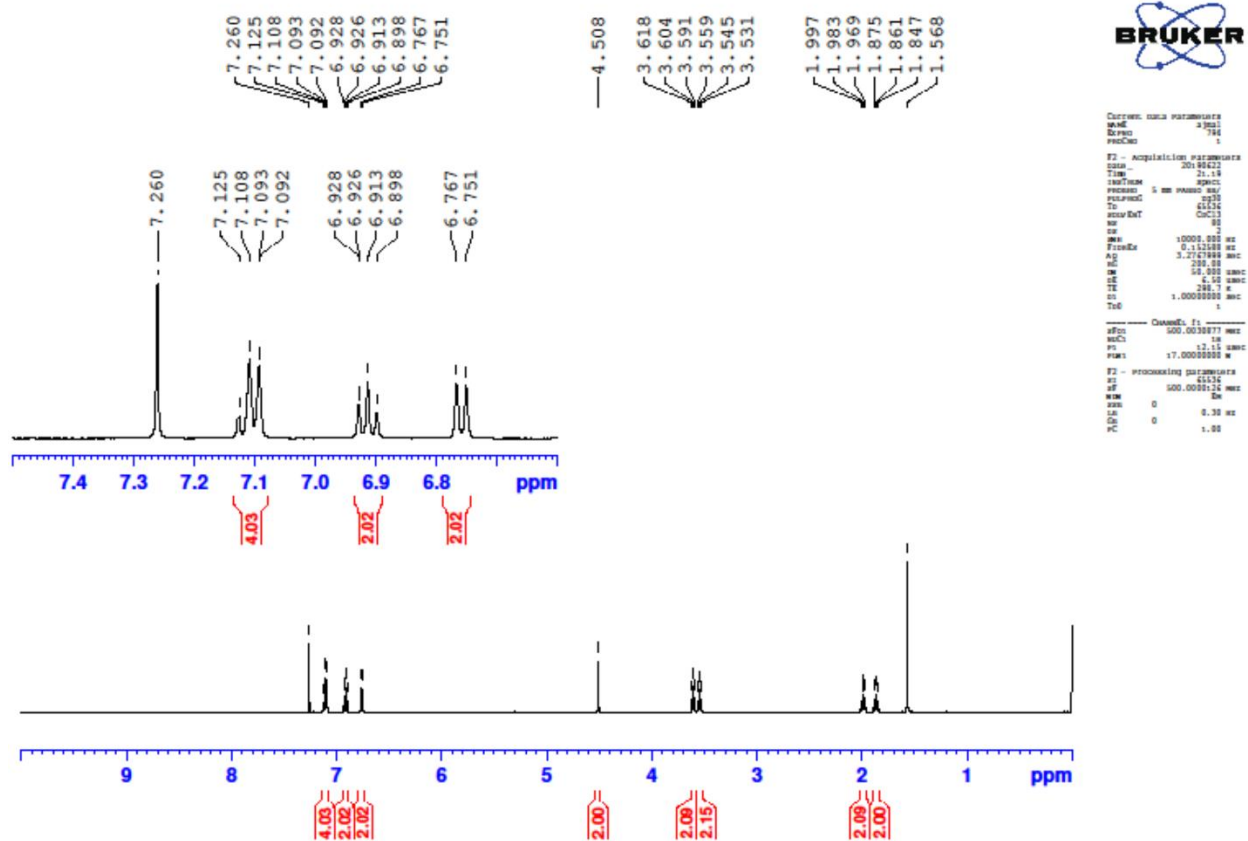

Figure S32:  $^{13}\text{C}$  NMR of compound 10

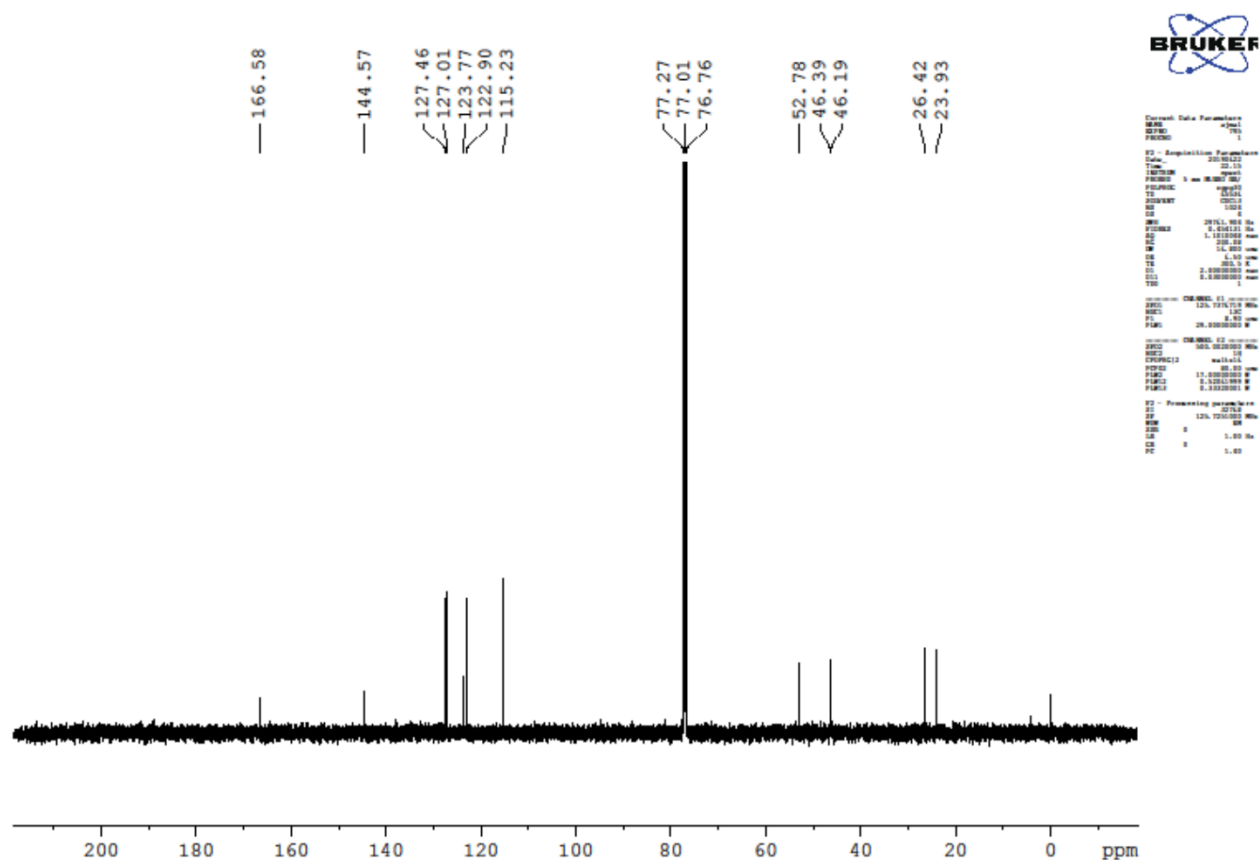

Figure S33: Mass of compound 10

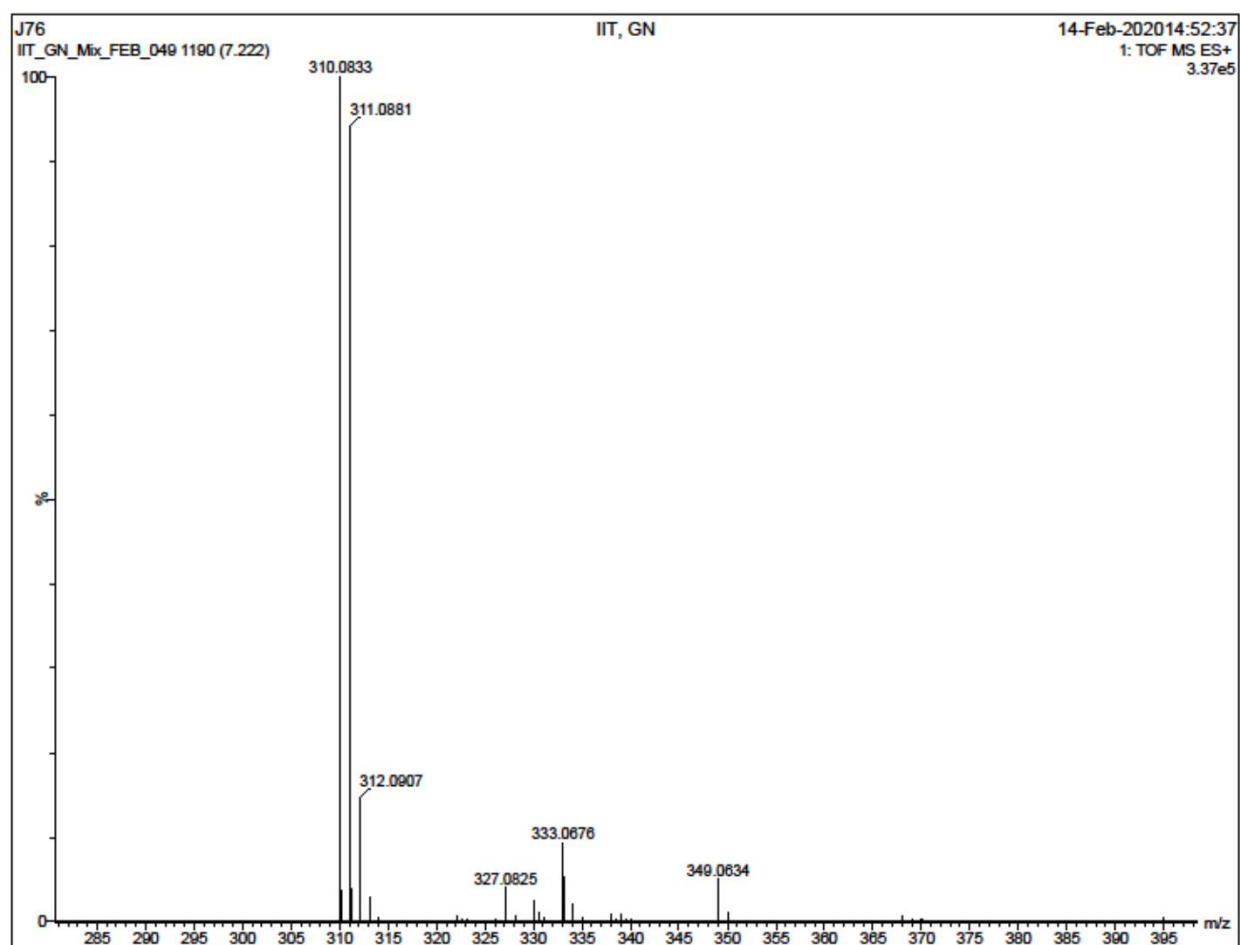

Figure S34:  $^1\text{H}$  NMR of compound 13

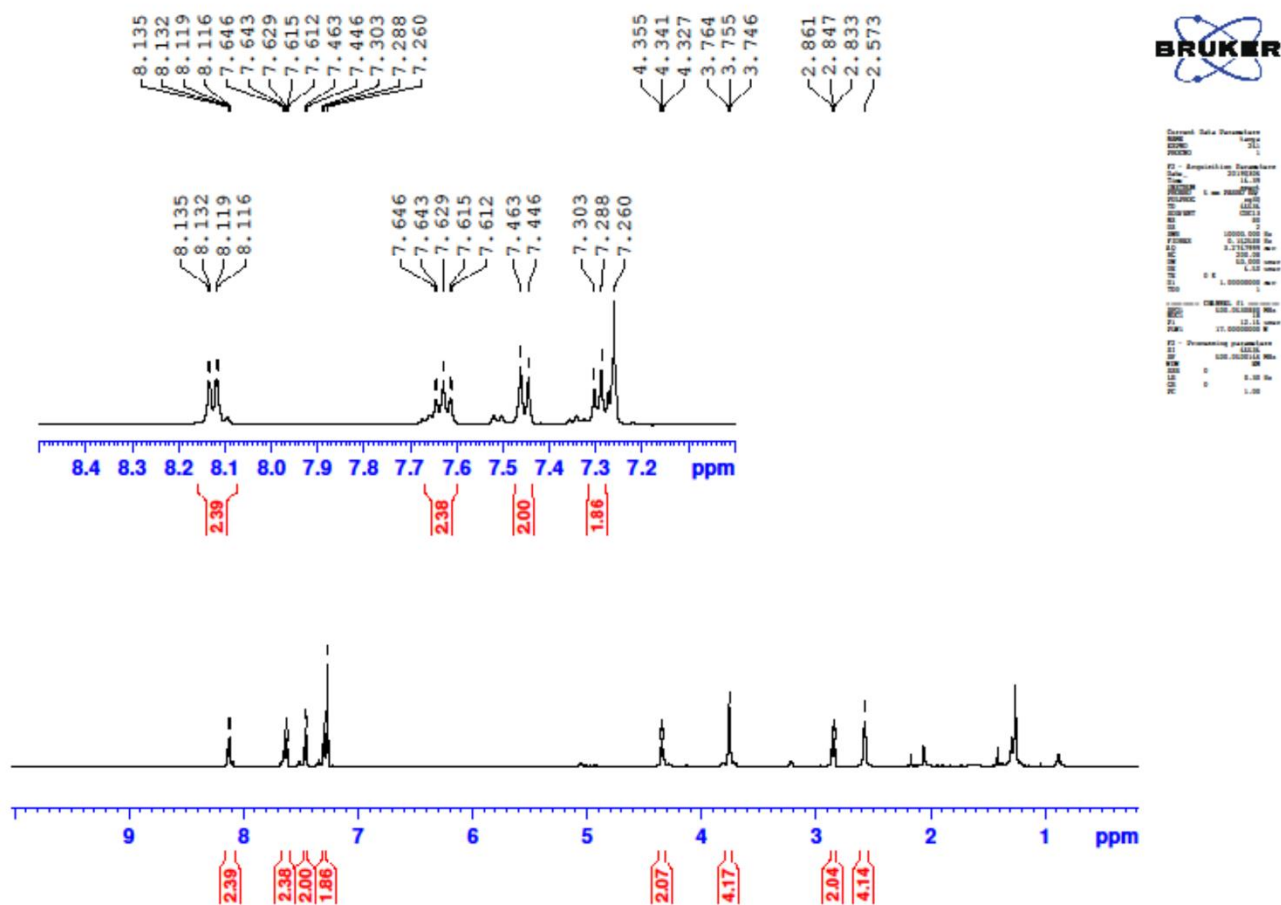

Figure S35:  $^{13}\text{C}$  NMR of compound 13

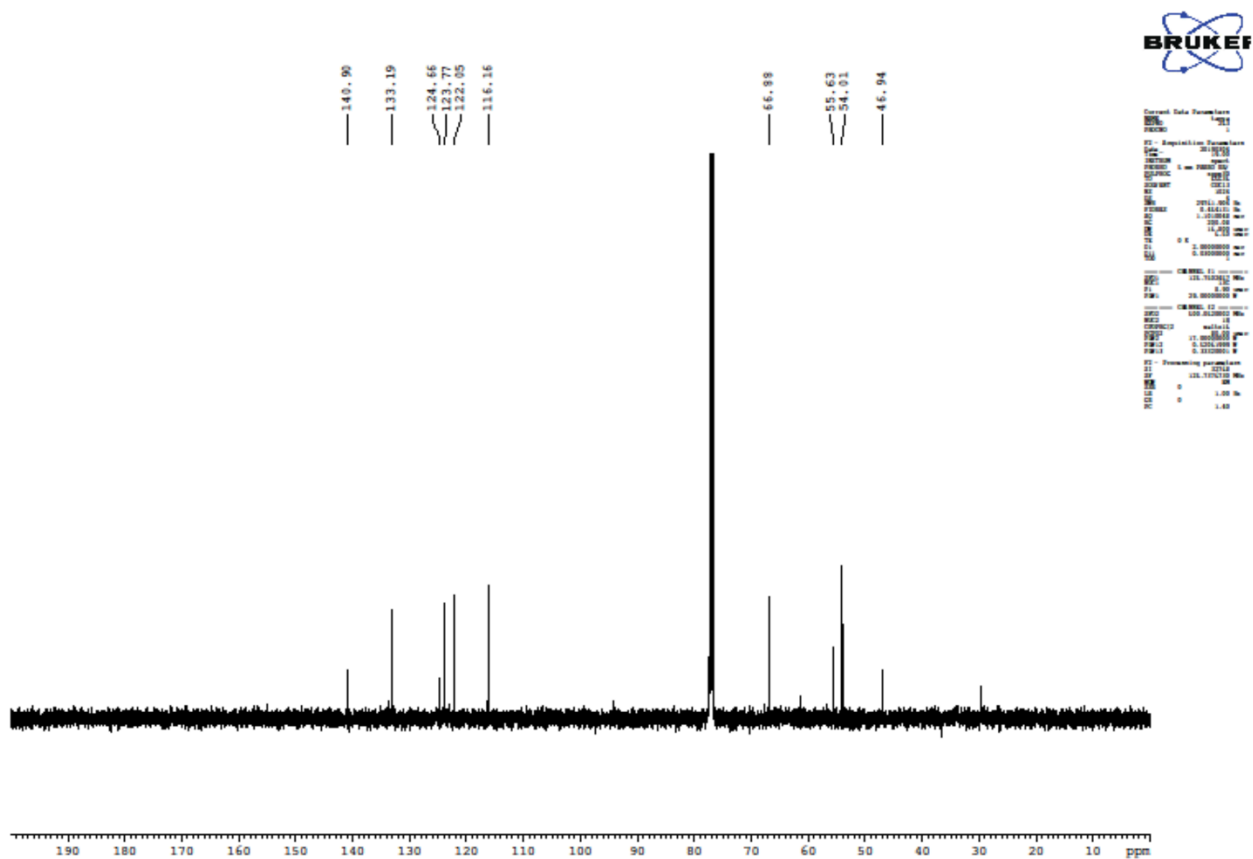

Figure S36: Mass of compound 13

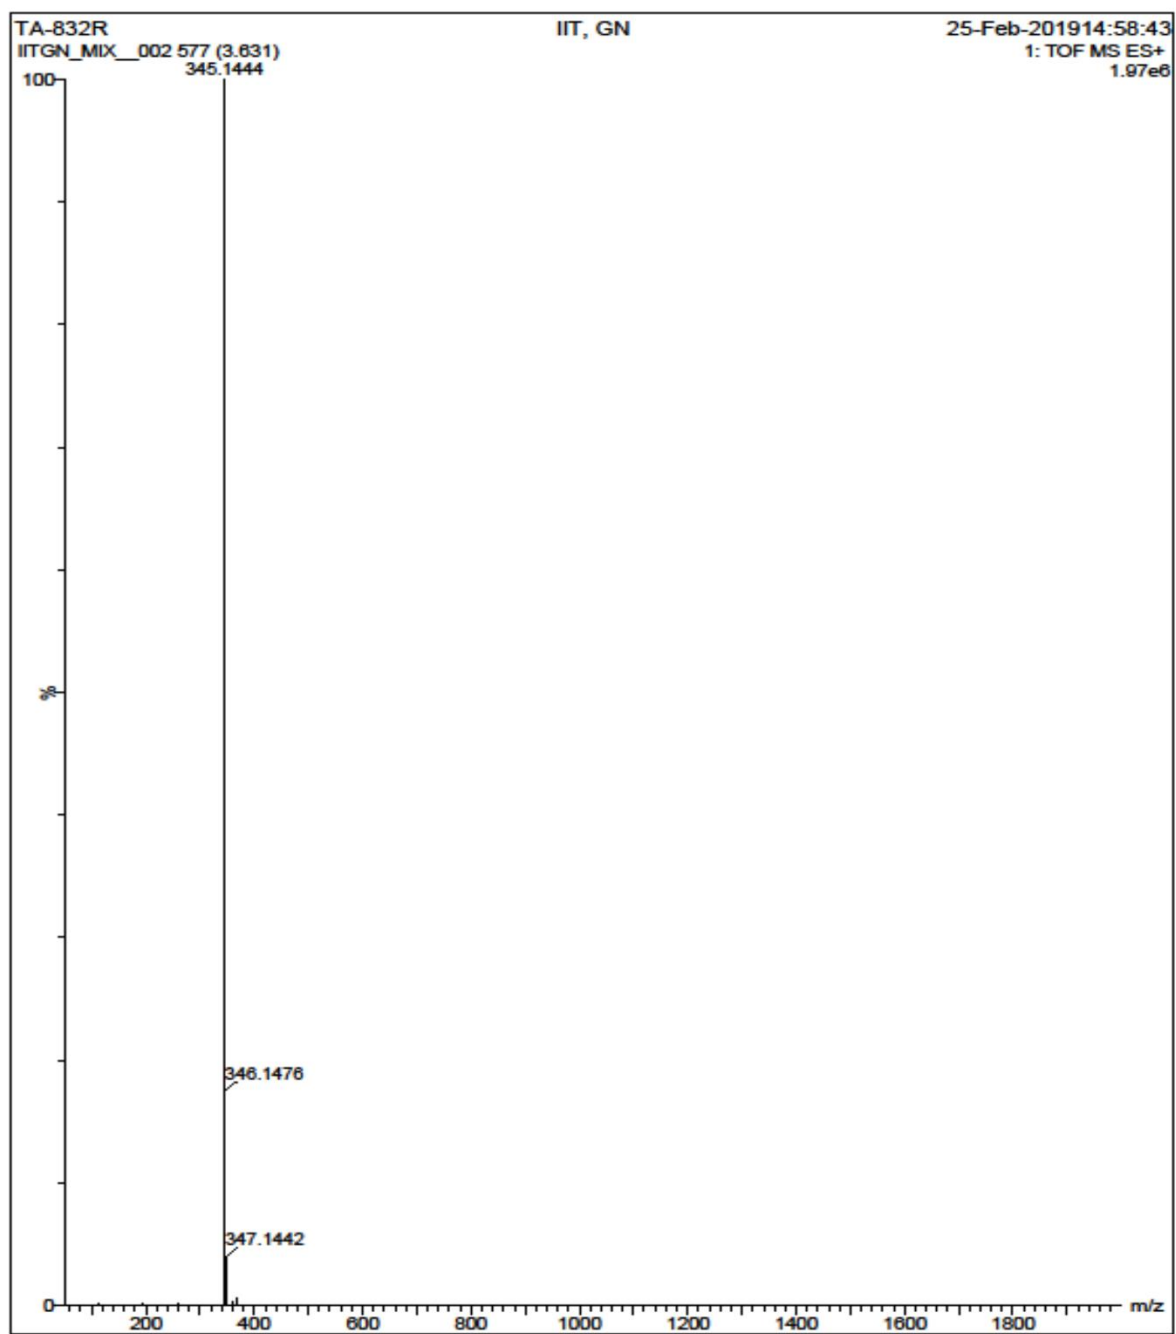

Figure S37:  $^1\text{H}$  NMR of compound 14

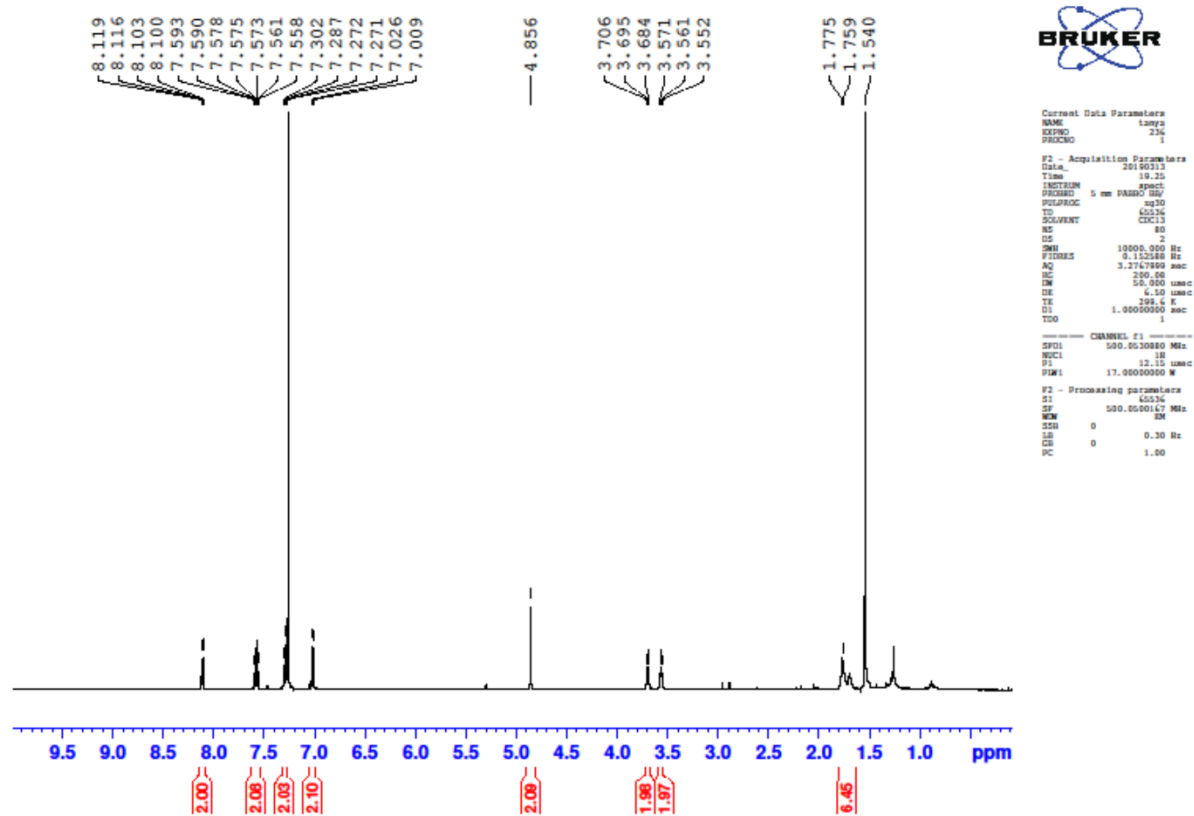

Figure S38:  $^{13}\text{C}$  NMR of compound 14

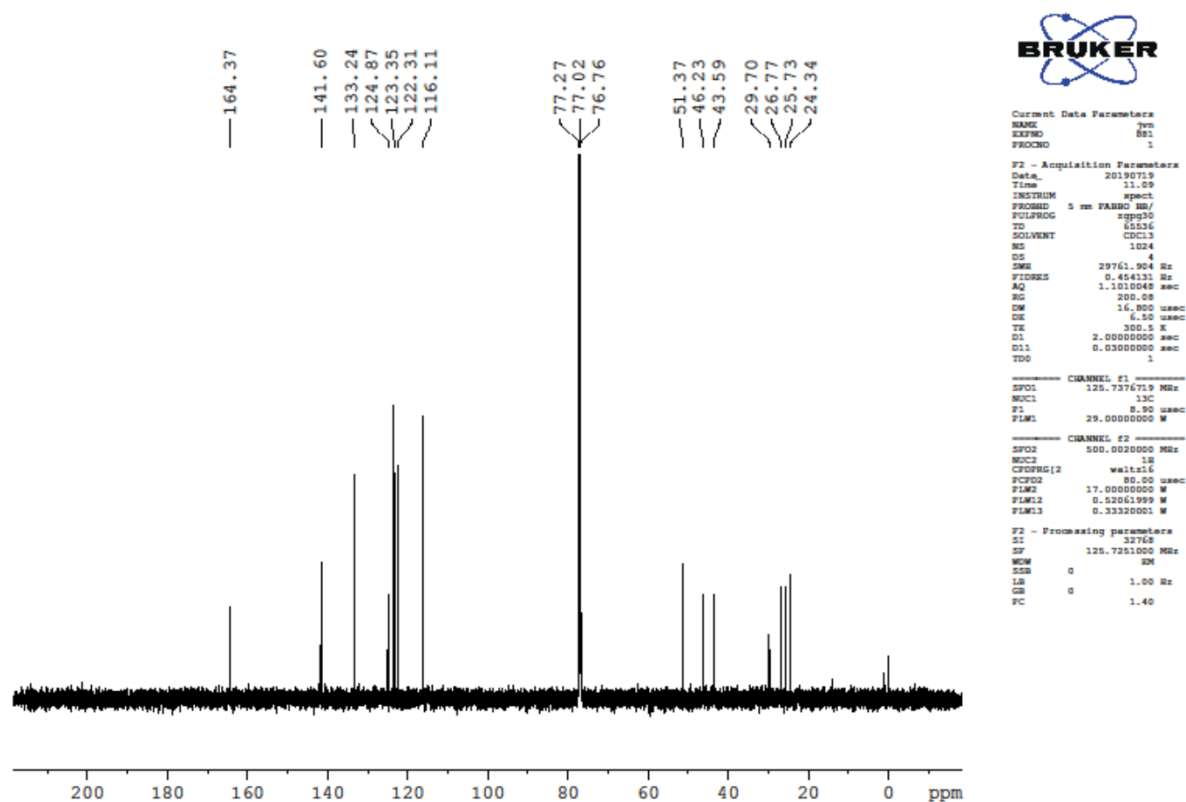

**Figure S39: Mass of compound 14**

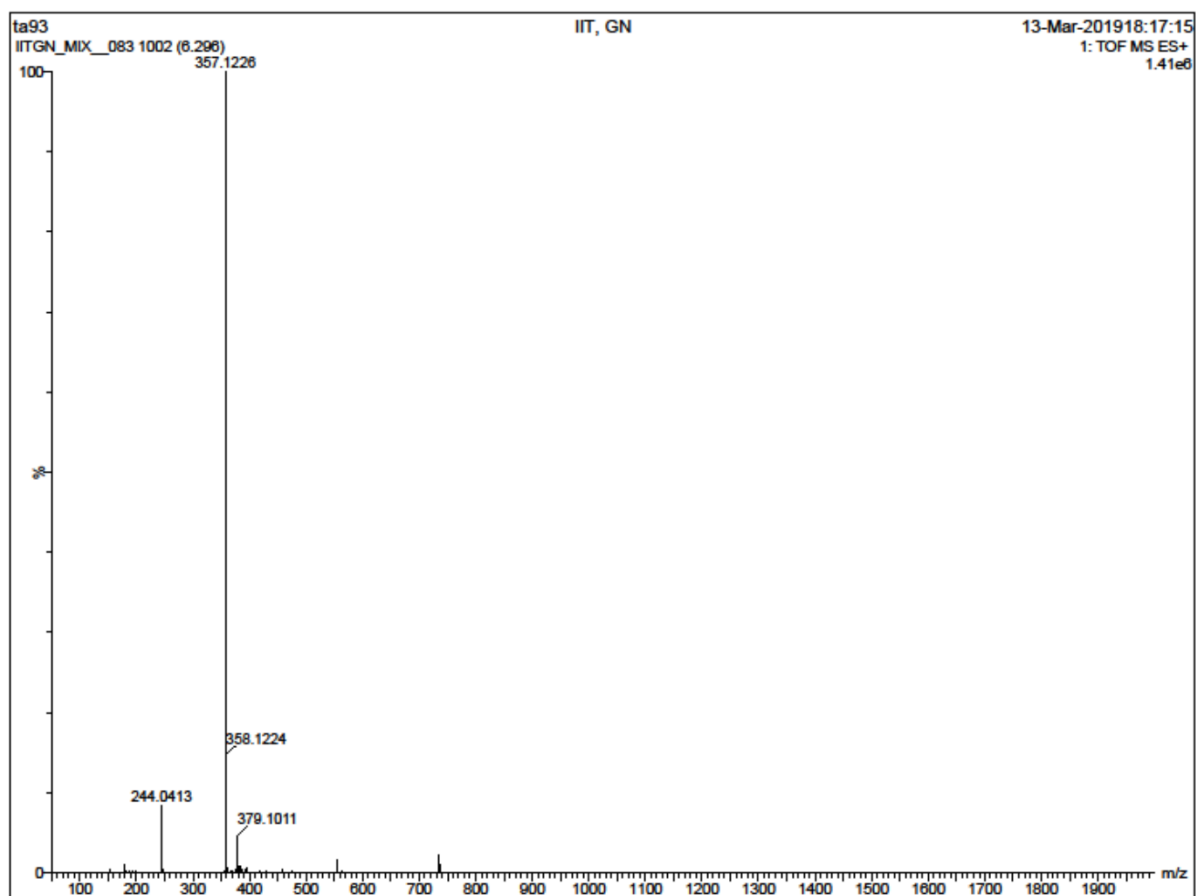

Figure S40:  $^1\text{H}$  NMR of compound 15

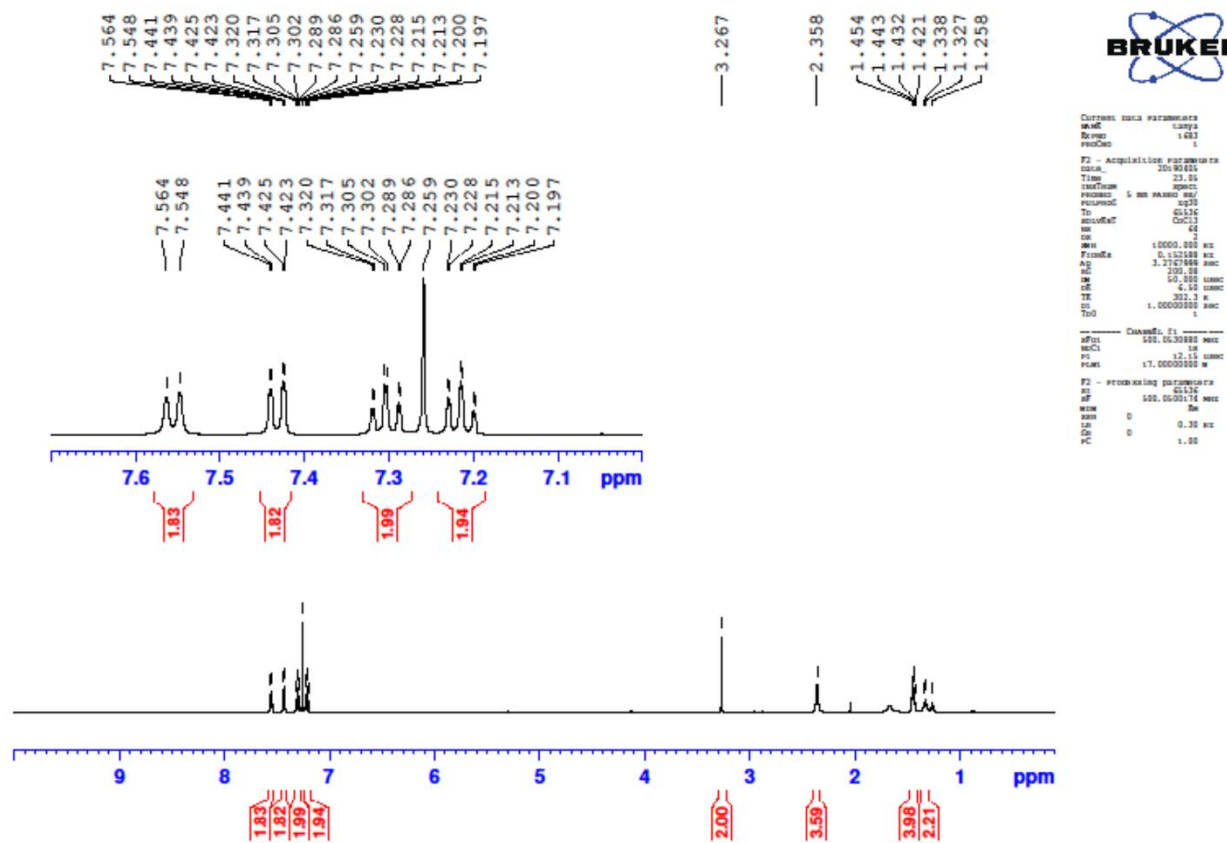

Figure S41:  $^{13}\text{C}$  NMR of compound 15

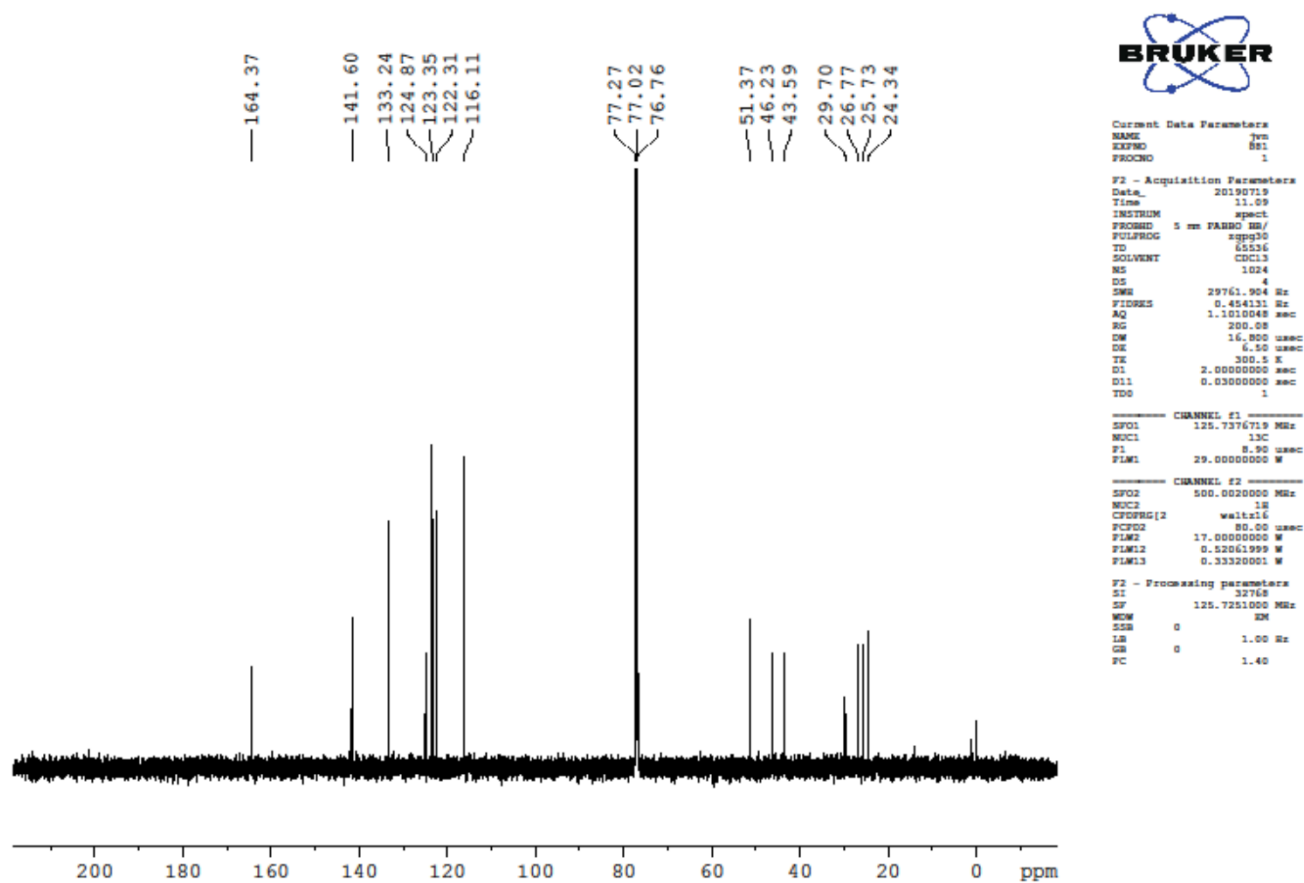

**Figure S42. Raw Images of western blots:**

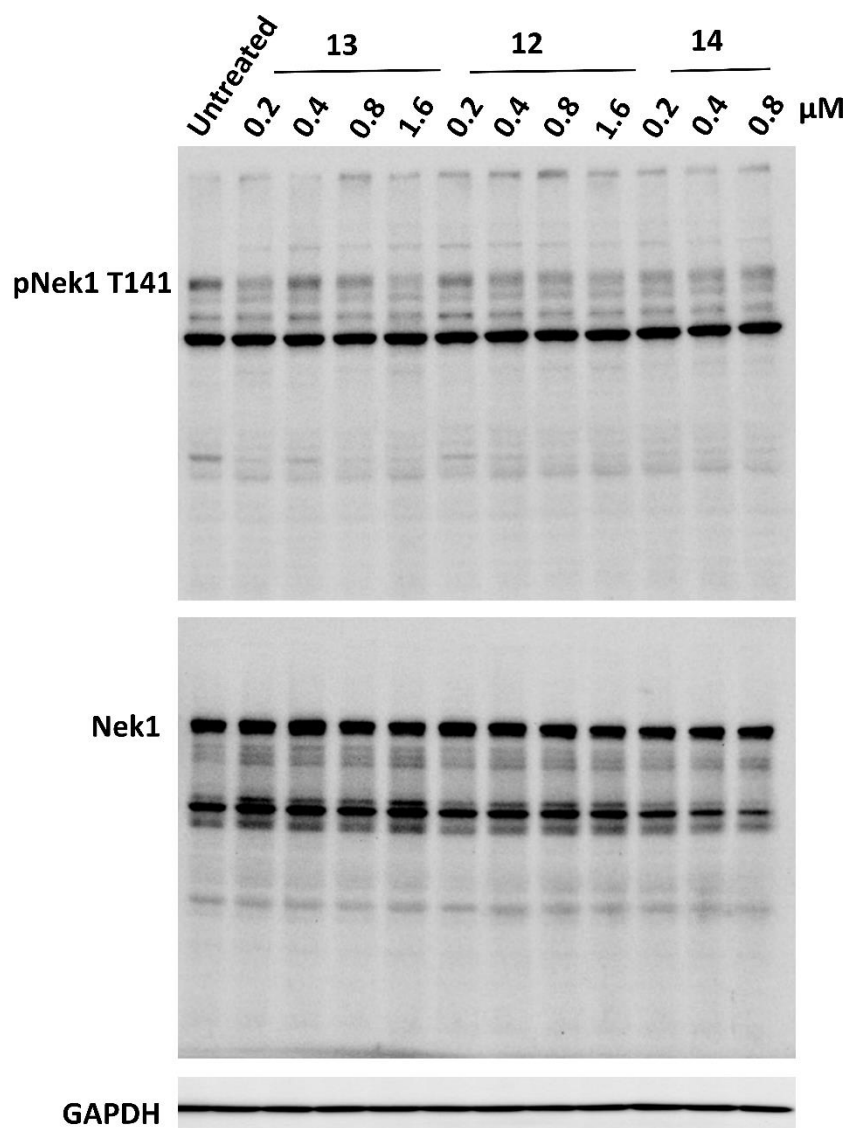

The pNek1-T141 and Nek1 are replica-probed. GAPDH blot itself was cut to avoid repeated probing.
